# Supplementary material for: Design, Synthesis and Evaluation of Oxazaborine Inhibitors of the NLRP3 Inflammasome
Source: PubMed Central journal article supplement (PMC5947144; doi:10.1002/cmdc.201700731), 2018-02-05
Supplement: CMDC-13-312-s001.pdf [file CMDC-13-312-s001.pdf]

## Supporting Information

### **Design, Synthesis and Evaluation of Oxazaborine Inhibitors of the NLRP3 Inflammasome**

Alex G. Baldwin,<sup>[a]</sup> Victor S. Tapia,<sup>[b]</sup> Tessa Swanton,<sup>[b]</sup> Claire S. White,<sup>[b]</sup> James A. Beswick,<sup>[a]</sup> David Brough,<sup>\*[b]</sup> and Sally Freeman<sup>\*[a]</sup>

cmdc\_201700731\_sm\_miscellaneous\_information.pdf

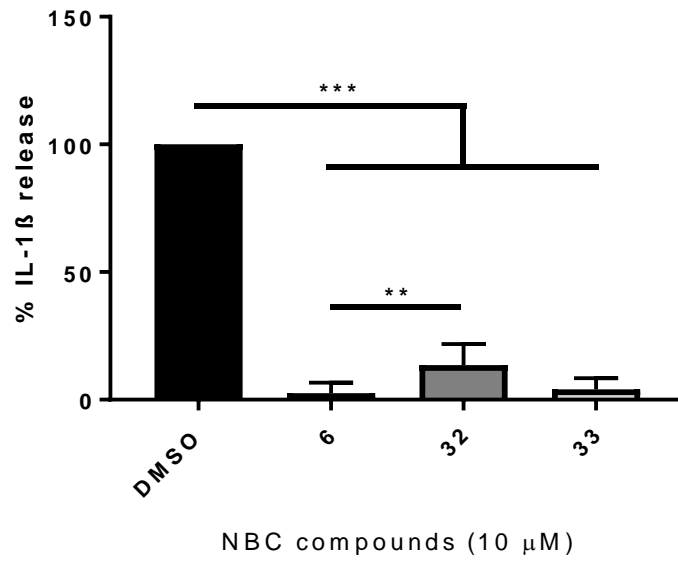

**Figure S1:** Effects of NBC32 and NBC33 on IL-1 $\beta$  release. THP-1 cells were primed with LPS (1  $\mu$ g/ml, 4 h) and then treated with vehicle or NBC molecule (NBC6, NBC32 or NBC33) at 10  $\mu$ M for 15 min before stimulation with nigericin (10  $\mu$ M, 1h). IL-1 $\beta$  was measured by ELISA. The effects of the NBC molecules on IL-1 $\beta$  release was normalised to nigericin-induced IL-1 $\beta$  in the absence of any inhibitor. Data are presented as the mean  $\pm$  s.e.m. with a minimum of 3 experiments per group. Statistical analysis was performed using a one-way analysis of variance (ANOVA) followed by a Tukey's multiple comparison test.

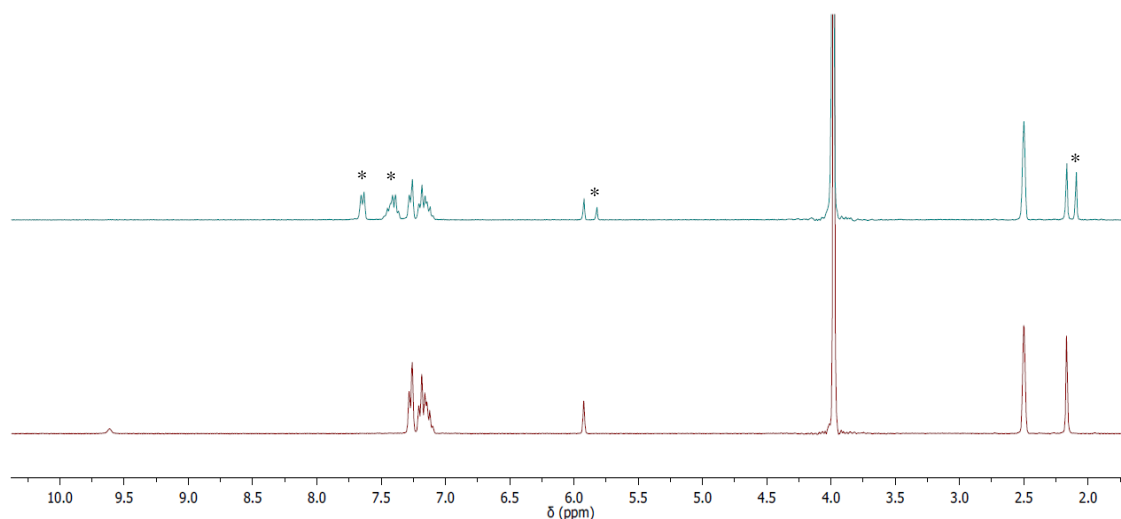

**Figure S2:** Stacked <sup>1</sup>H NMR spectra of BC23 (0.02 mmol) in 9:1 DMSO-d<sub>6</sub>/D<sub>2</sub>O (700  $\mu$ L) at 37 °C; red: 0 h, blue: 24 h. Chemical shifts are defined in parts per million and referenced against residual undeuterated DMSO-d<sub>6</sub> ( $\delta$  = 2.50 ppm). \* Indicates new peaks associated with hydrolysis products of BC23.

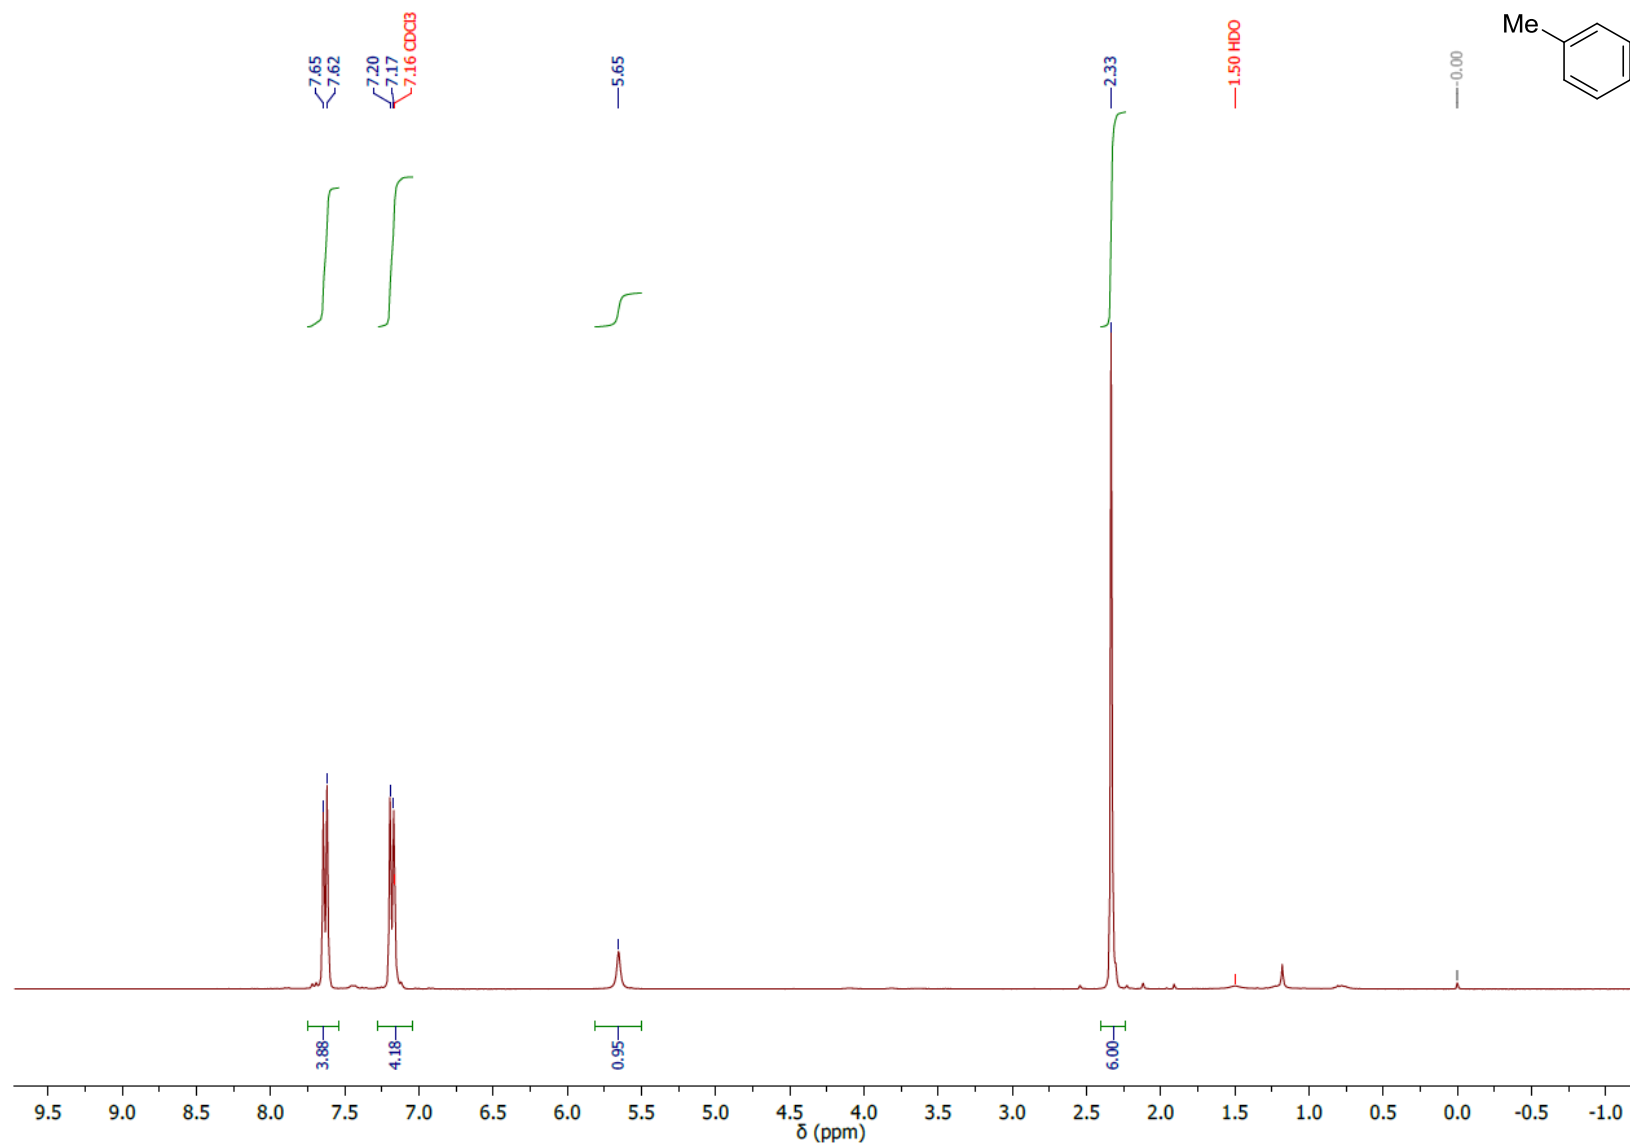

<sup>1</sup>H NMR spectrum (CDCl<sub>3</sub>) of di-*p*-tolylborinic acid (**5a**)

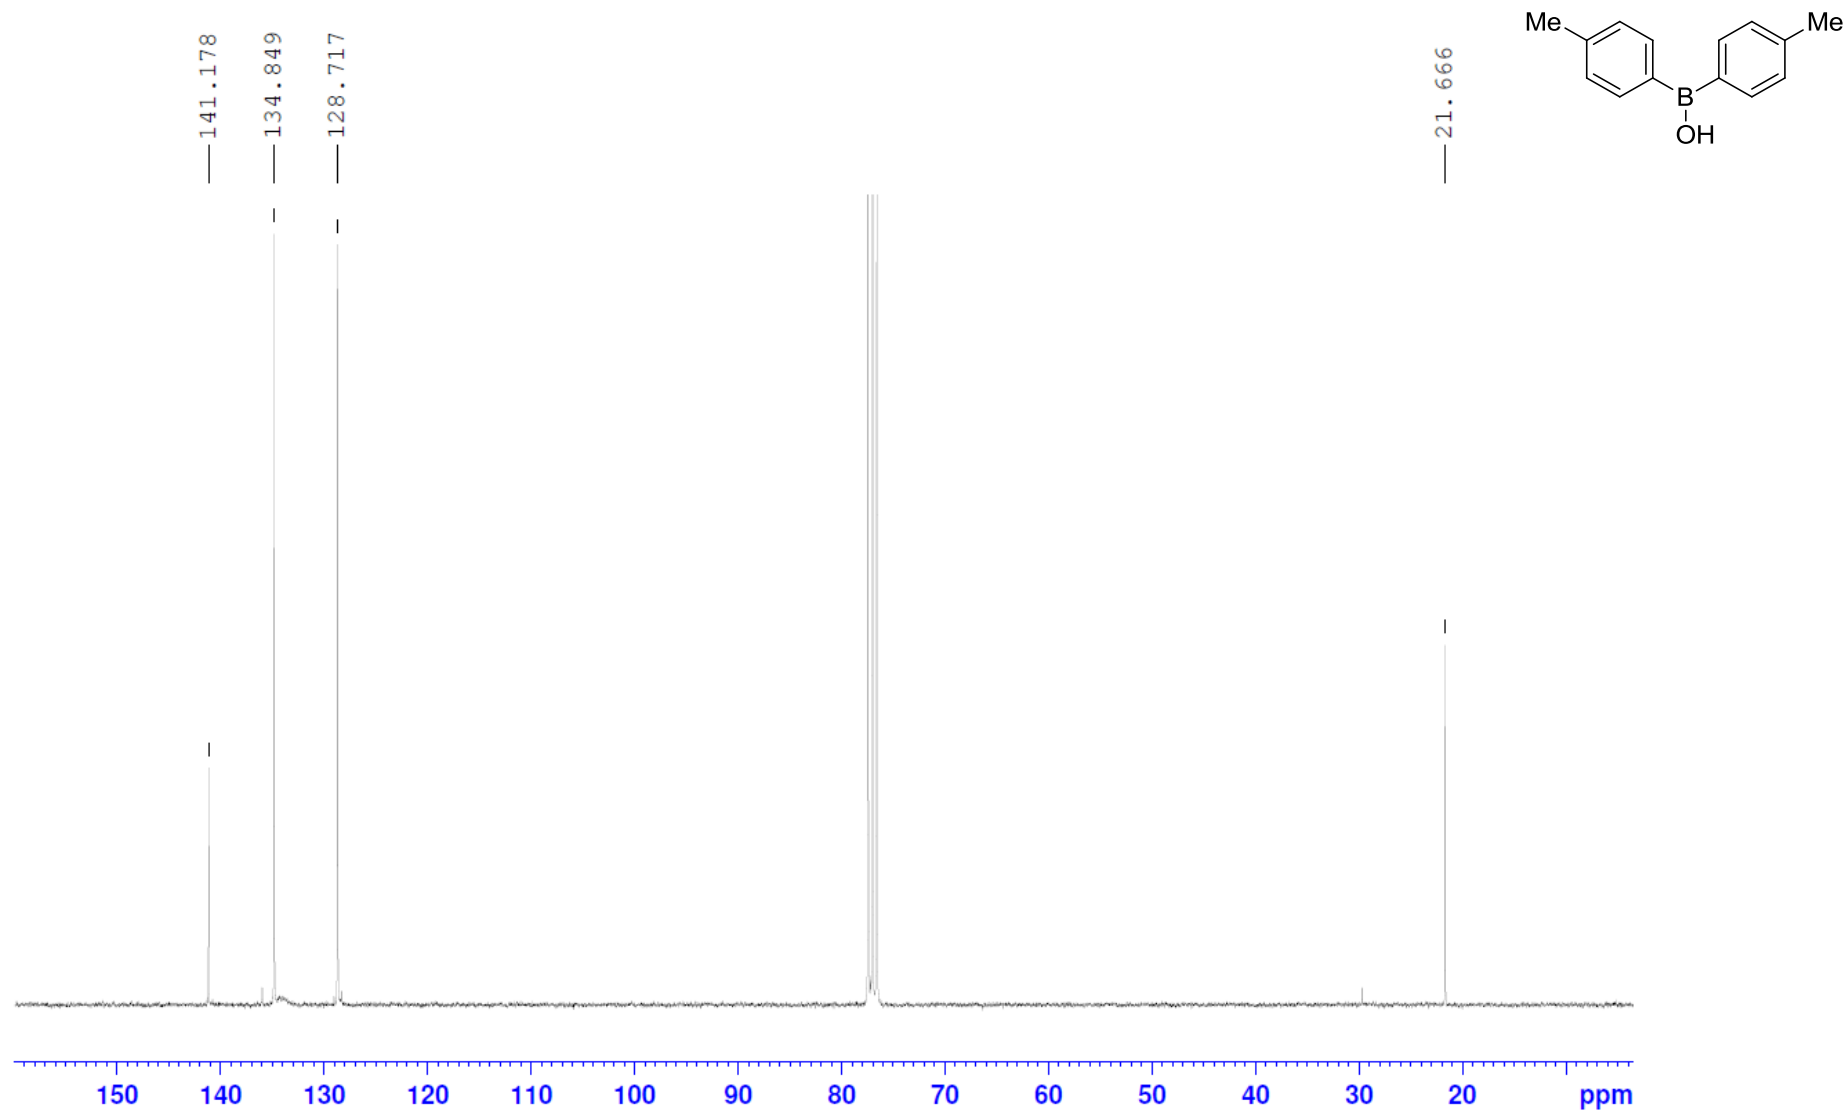

$^{13}\text{C}$  NMR spectrum ( $\text{CDCl}_3$ ) of di-*p*-tolylborinic acid (5a)

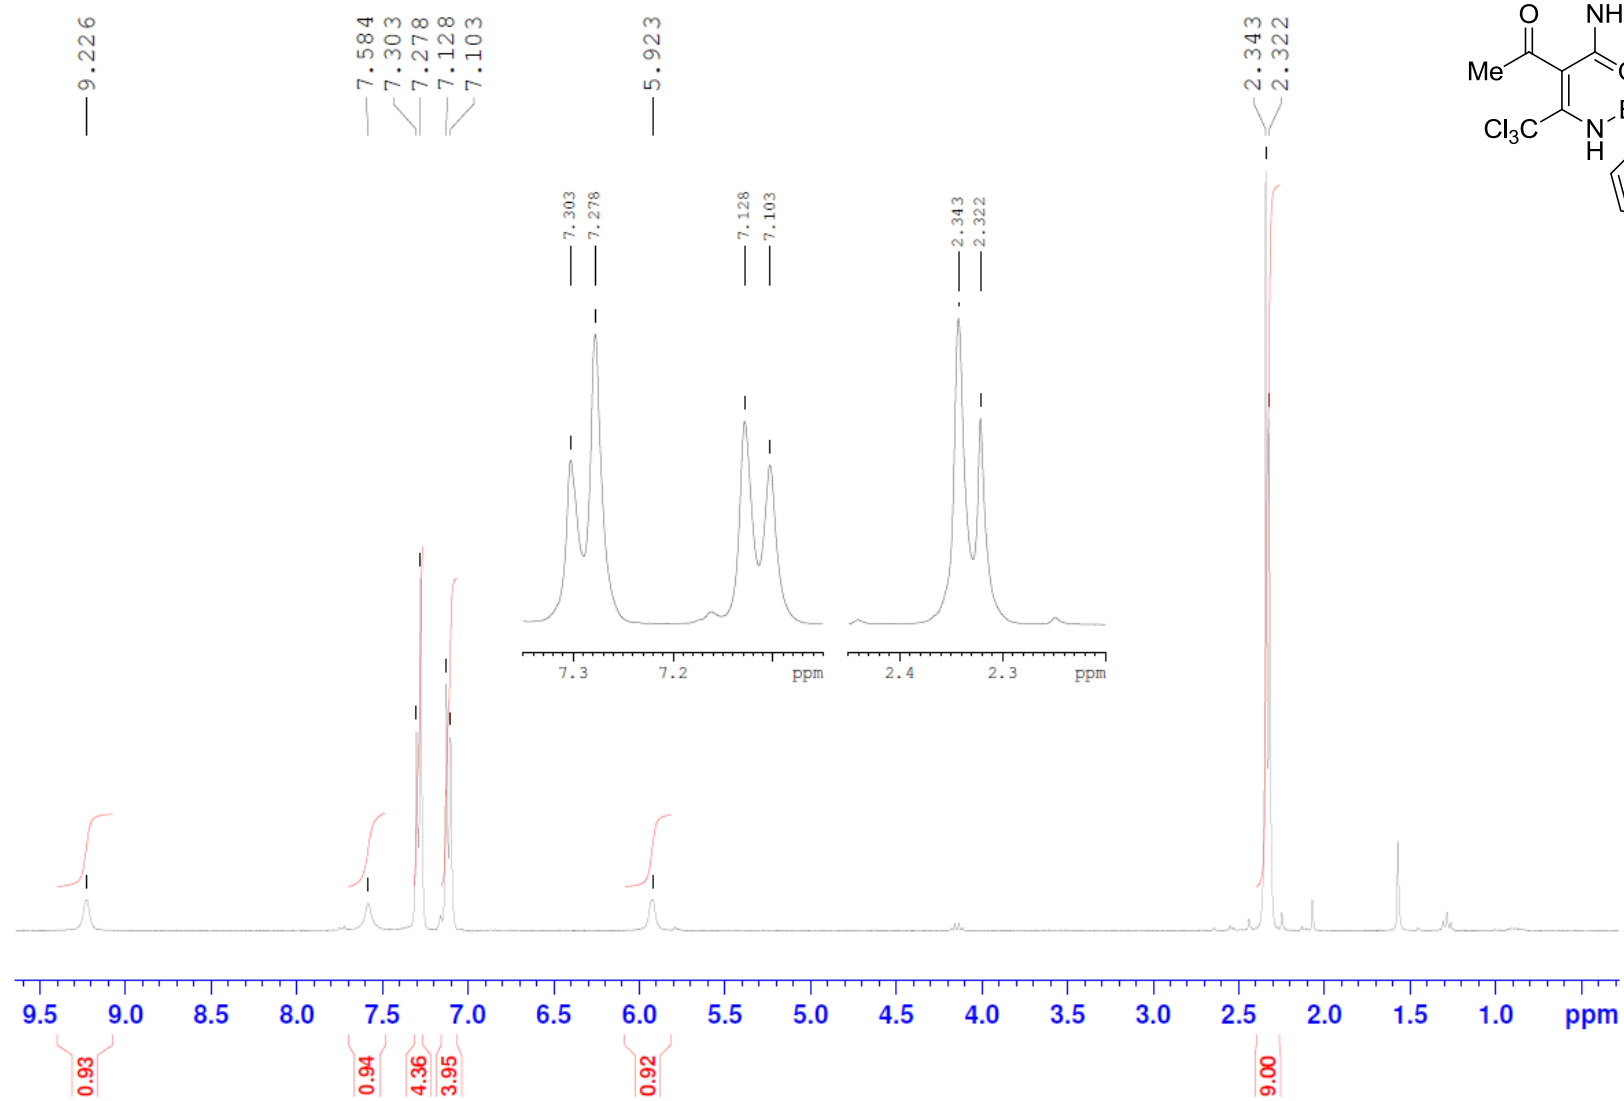

<sup>1</sup>H NMR spectrum (CDCl<sub>3</sub>) of 5-acetyl-6-amino-2,2-bis(*p*-tolyl)-4-(trichloromethyl)-2,3-dihydro-1,3,2-oxazaborinin-1-ium-2-uide (NBC32)

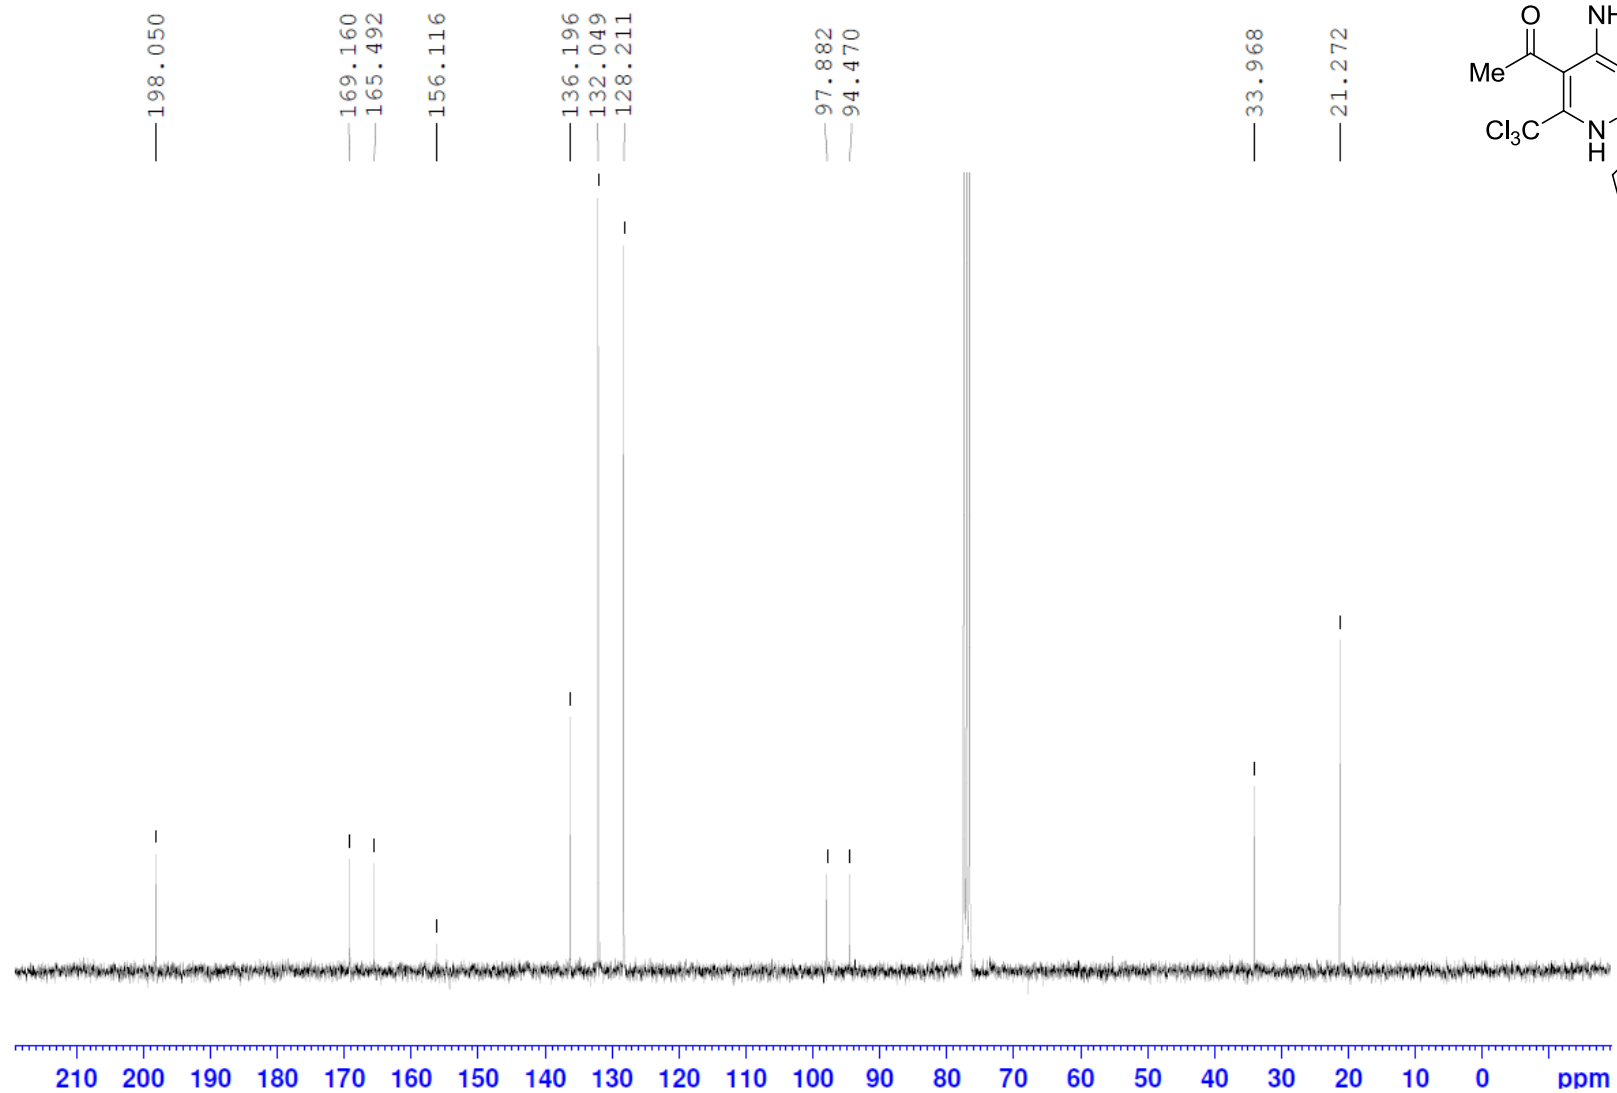

<sup>13</sup>C NMR spectrum (CDCl<sub>3</sub>) of 5-acetyl-6-amino-2,2-bis(*p*-tolyl)-4-(trichloromethyl)-2,3-dihydro-1,3,2-oxazaborinin-1-ium-2-uide (NBC32)

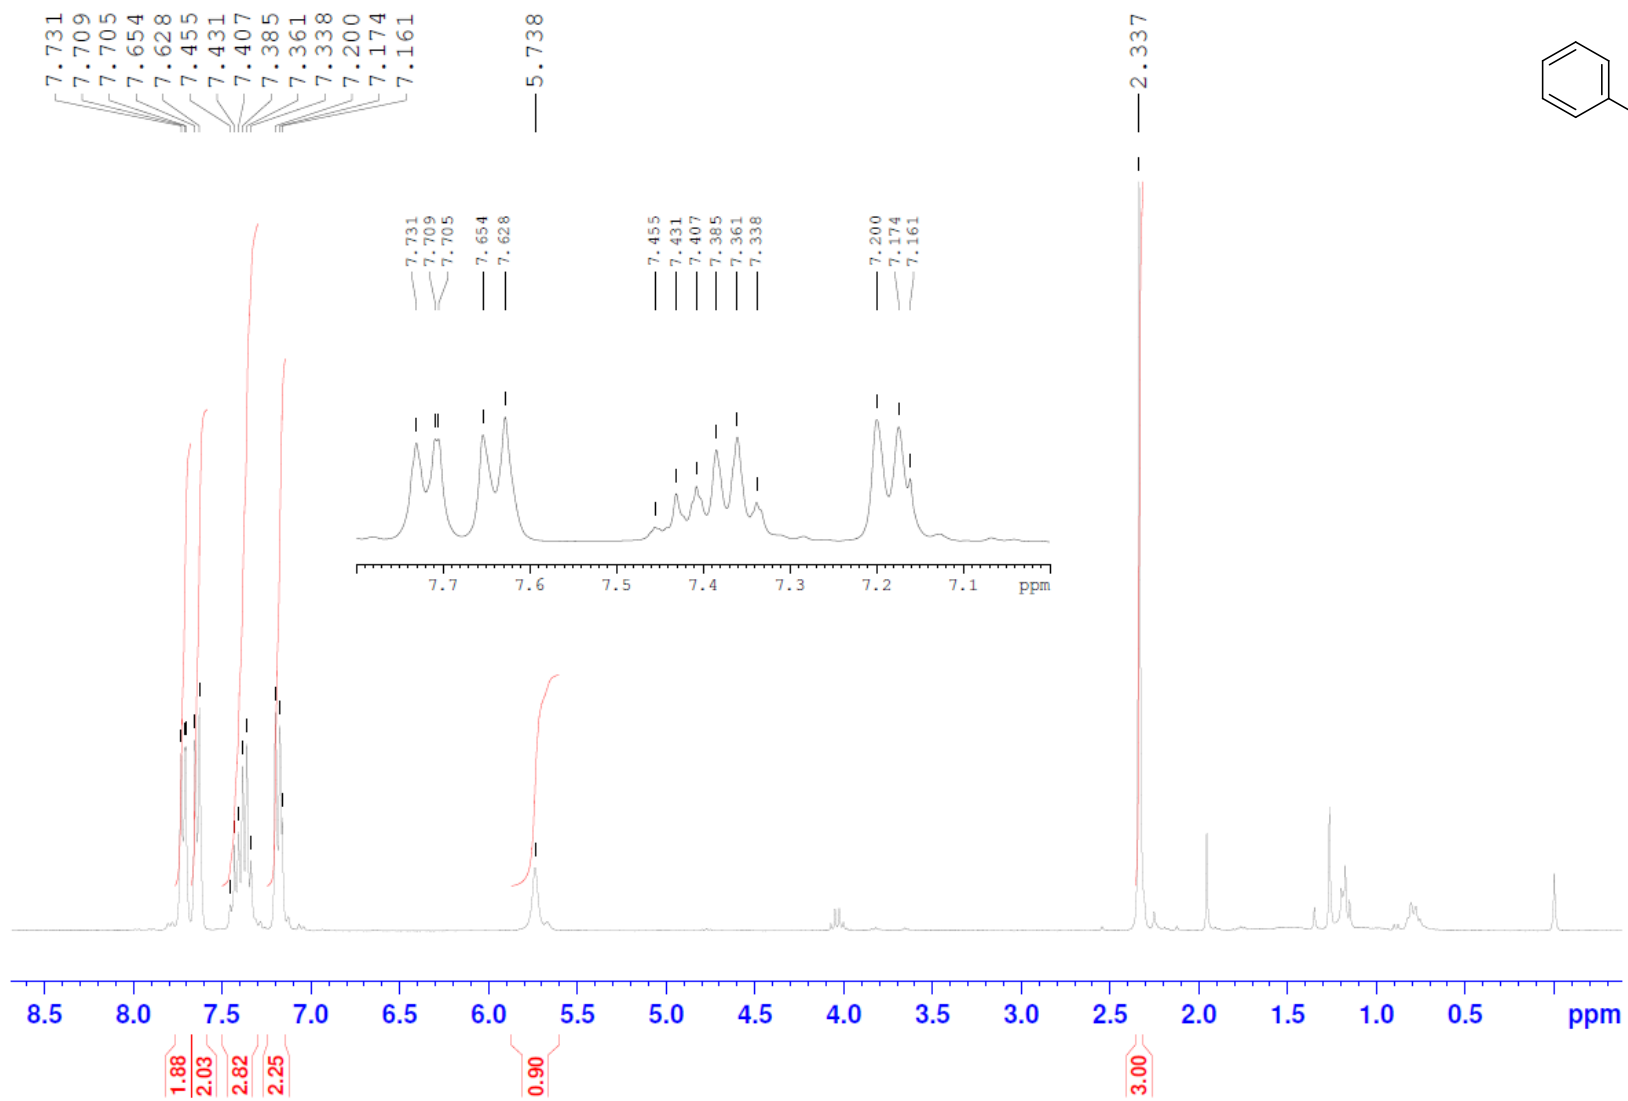

<sup>1</sup>H NMR spectrum (CDCl<sub>3</sub>) of (phenyl)(*p*-tolyl)borinic acid (6a)



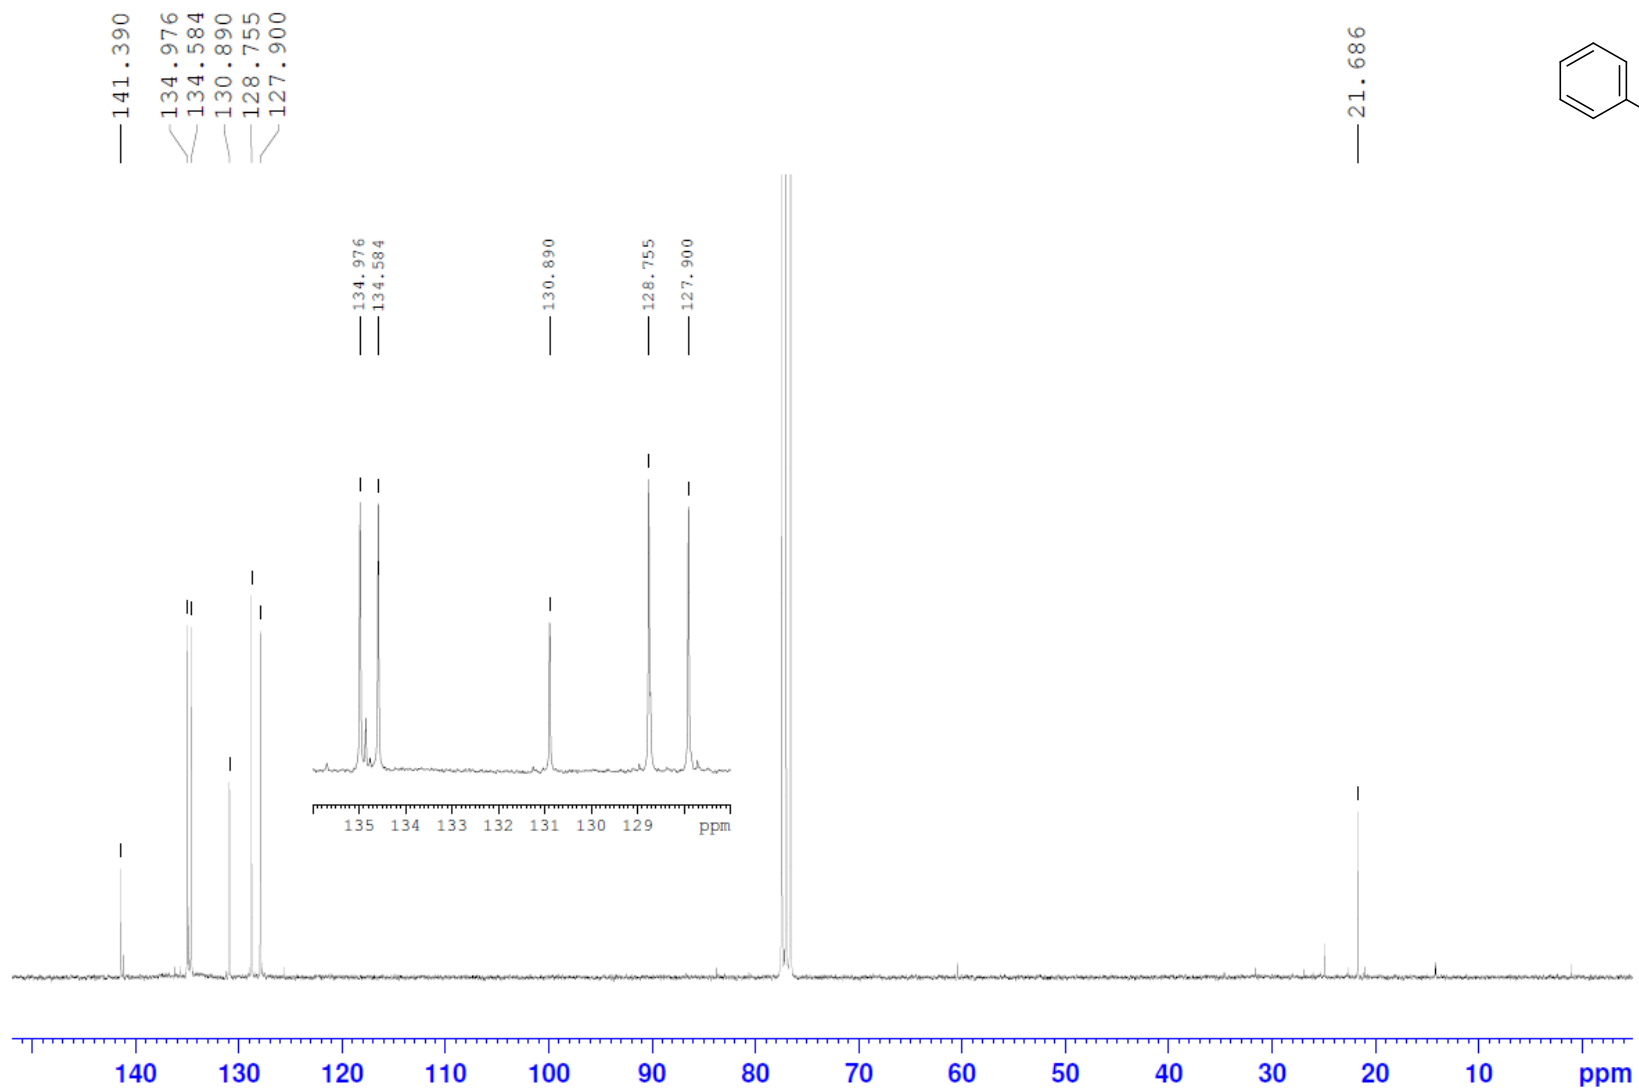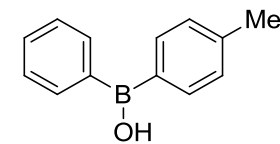

$^{13}\text{C}$  NMR spectrum ( $\text{CDCl}_3$ ) of (phenyl)(*p*-tolyl)borinic acid (**6a**)

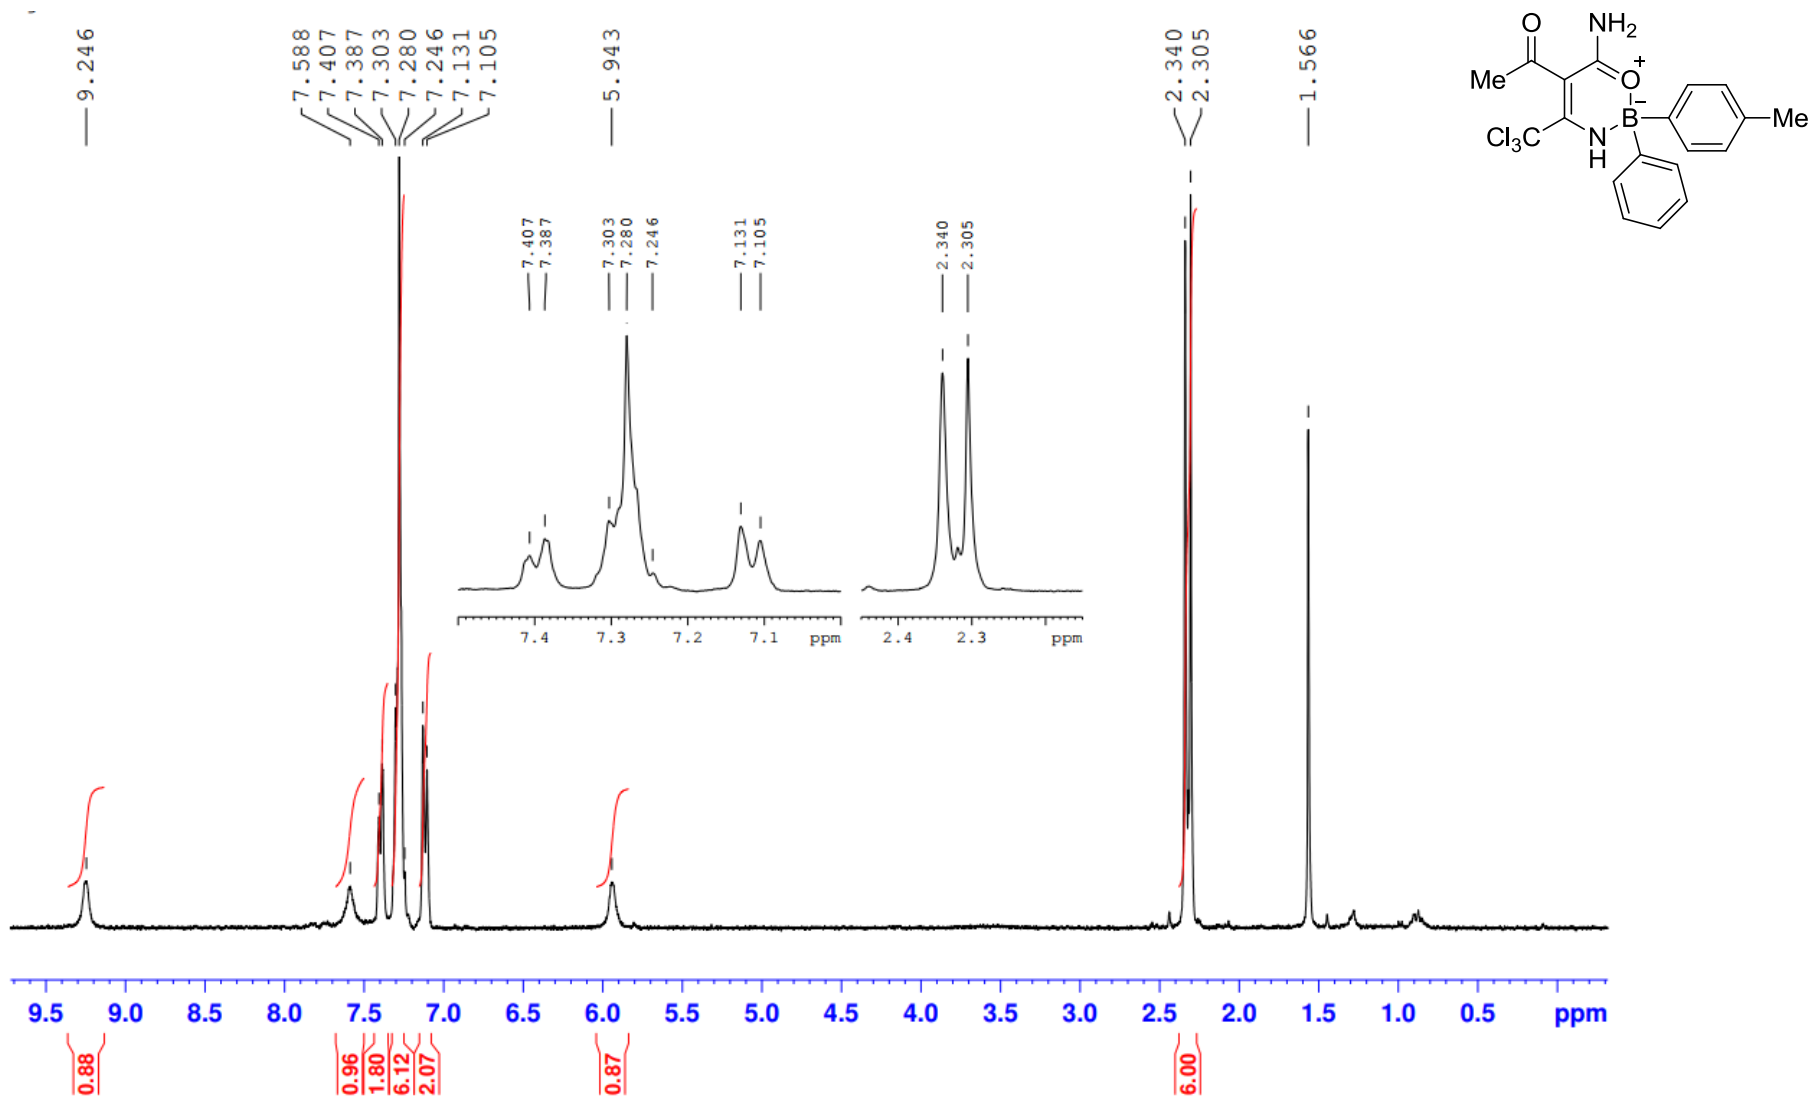

<sup>1</sup>H NMR spectrum (CDCl<sub>3</sub>) of 5-acetyl-6-amino-2-(phenyl)-2-(*p*-tolyl)-4-(trichloromethyl)-2,3-dihydro-1,3,2-oxazaborinin-1-ium-2-uide (NBC33)

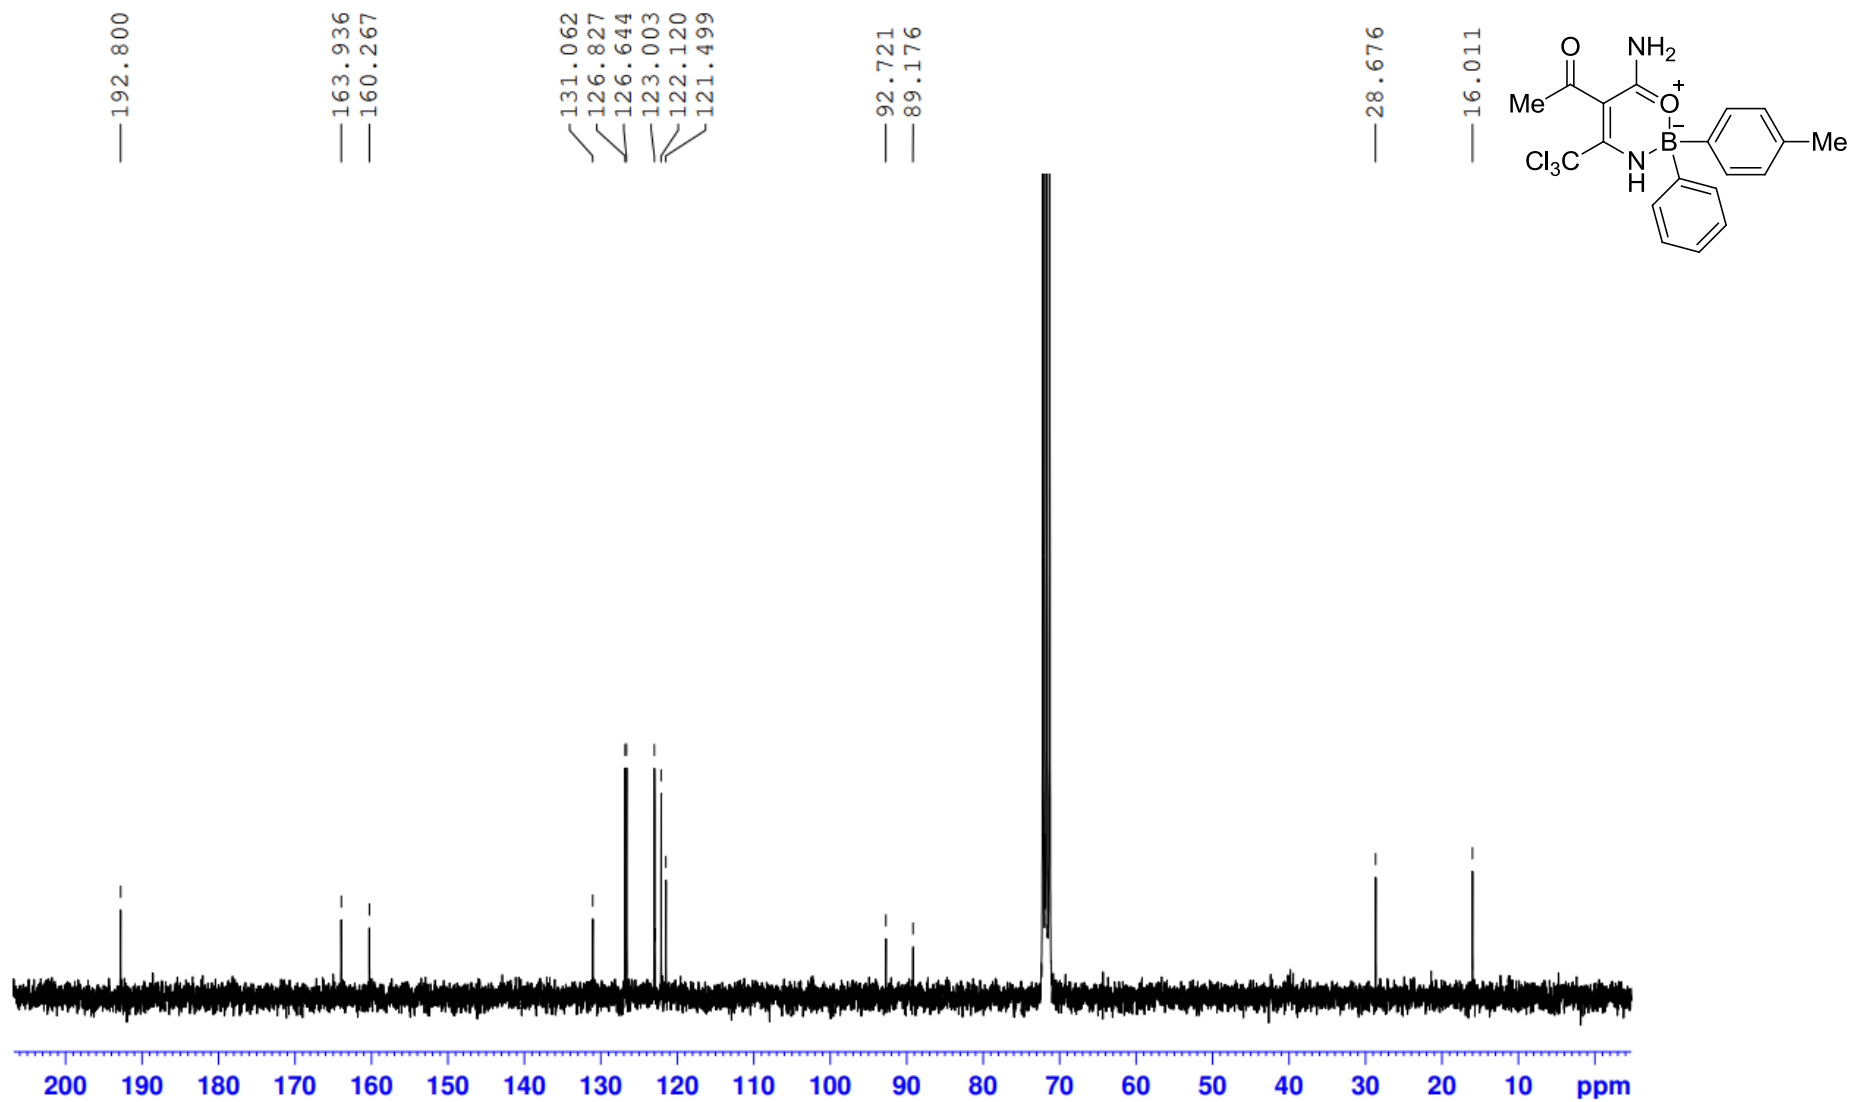

<sup>13</sup>C NMR spectrum (CDCl<sub>3</sub>) of 5-acetyl-6-amino-2-(phenyl)-2-(*p*-tolyl)-4-(trichloromethyl)-2,3-dihydro-1,3,2-oxazaborinin-1-ium-2-uide (NBC33)

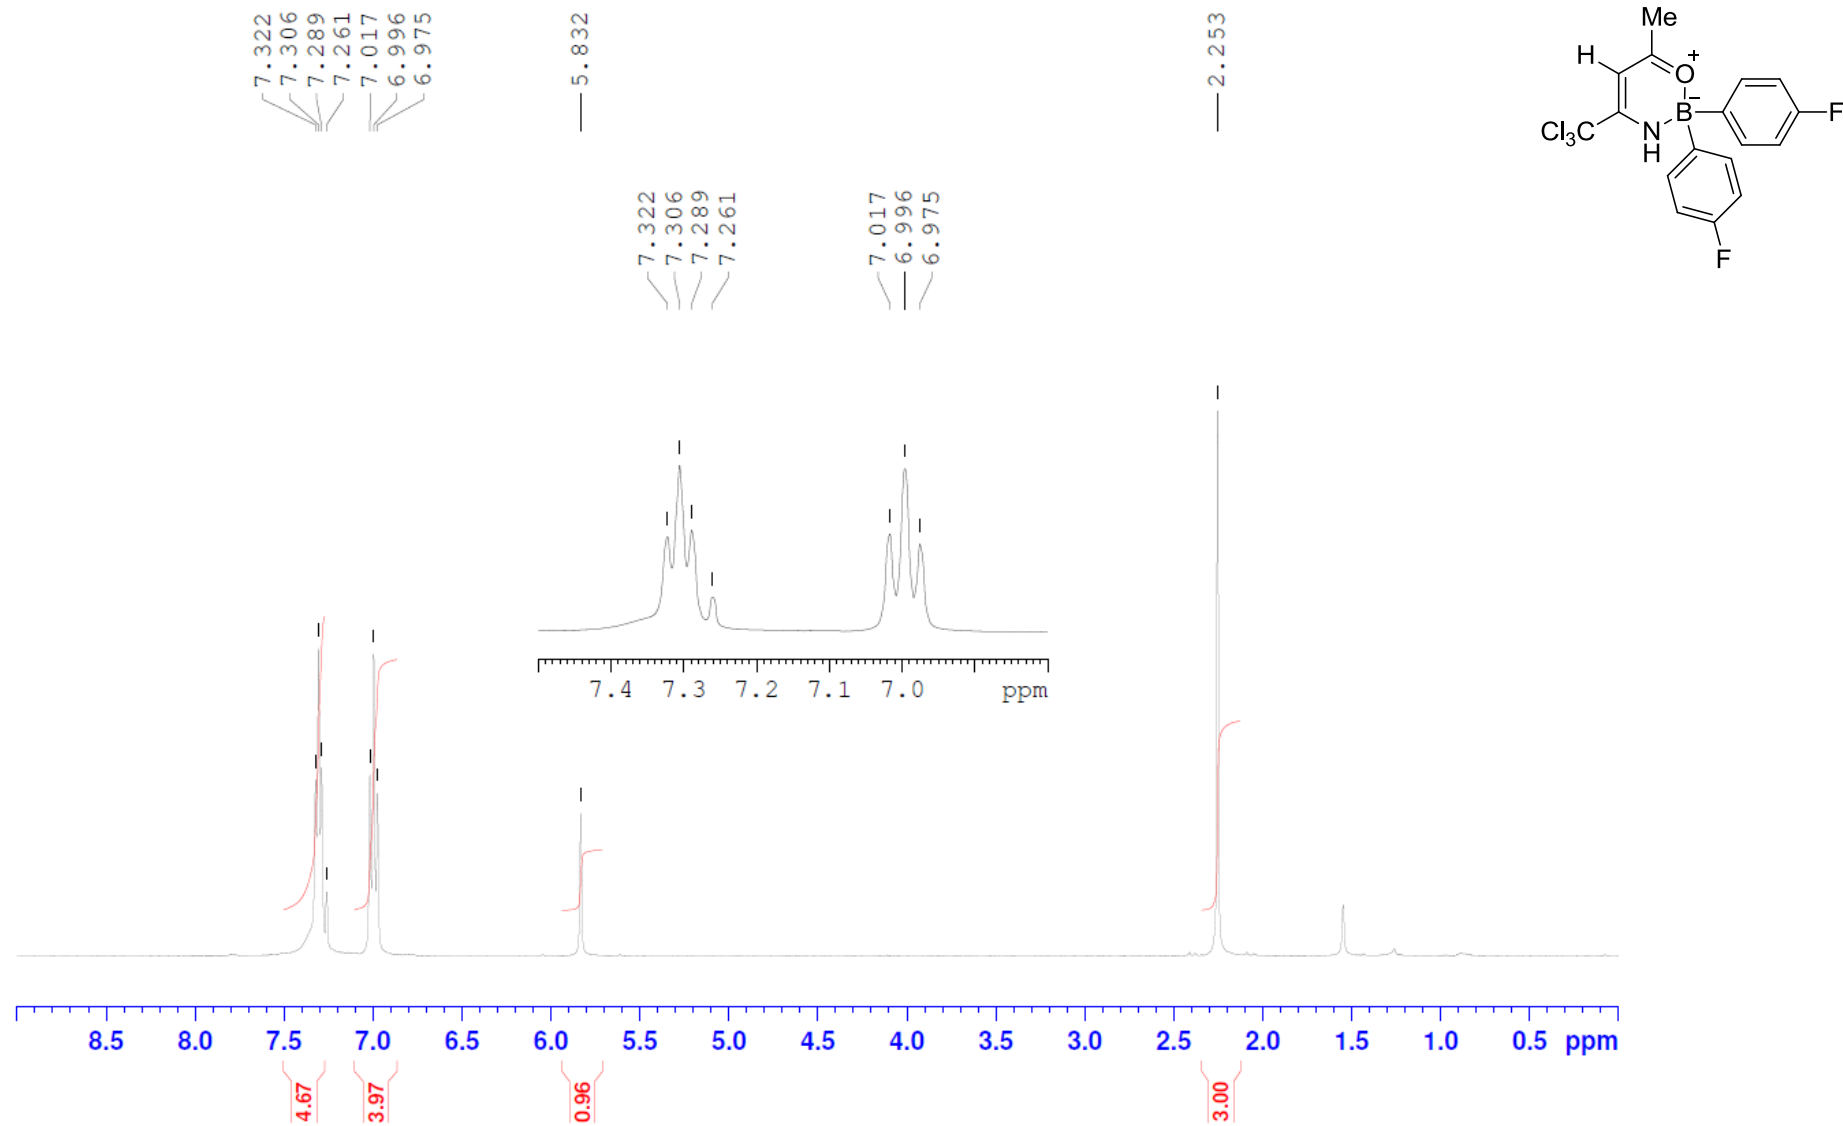

<sup>1</sup>H NMR spectrum (CDCl<sub>3</sub>) of 2,2-bis(4-fluorophenyl)-6-methyl-4-(trichloromethyl)-2,3-dihydro-1,3,2-oxazaborinin-1-ium-2-uide (NBC35)

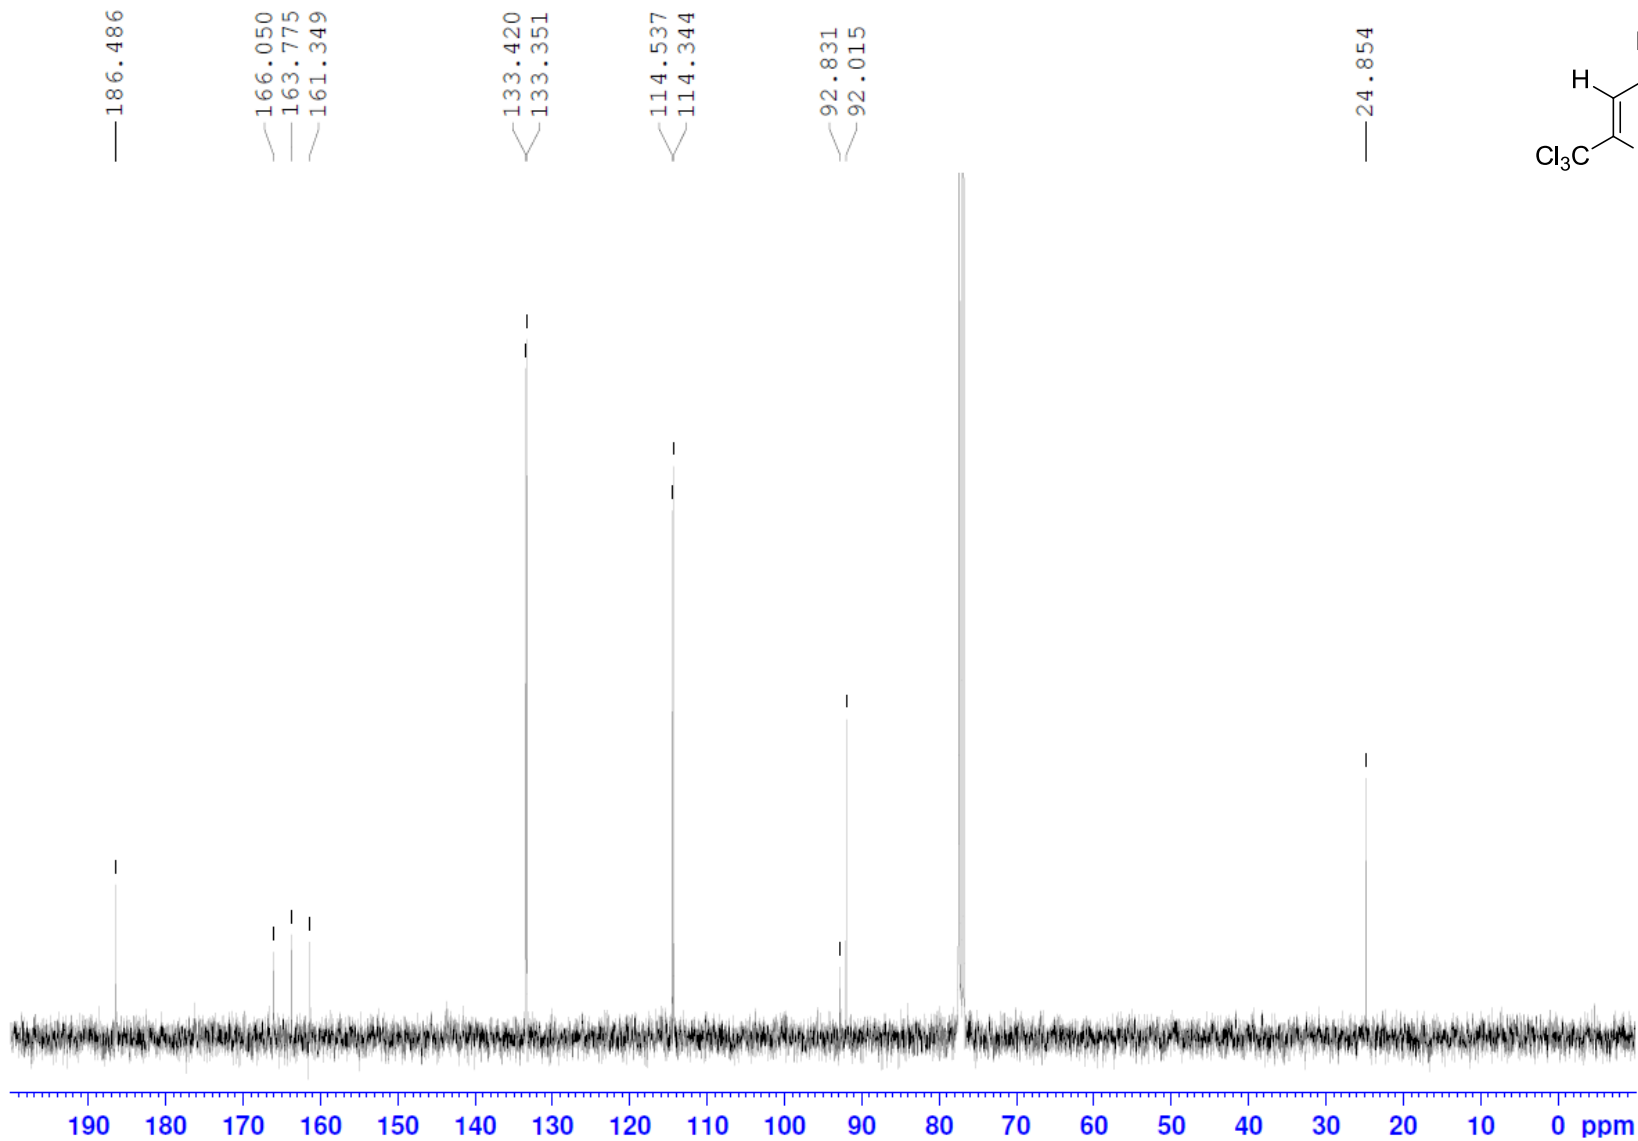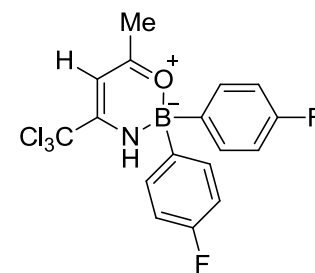

<sup>13</sup>C NMR spectrum (CDCl<sub>3</sub>) of 2,2-bis(4-fluorophenyl)-6-methyl-4-(trichloromethyl)-2,3-dihydro-1,3,2-oxazaborinin-1-ium-2-uide (NBC35)

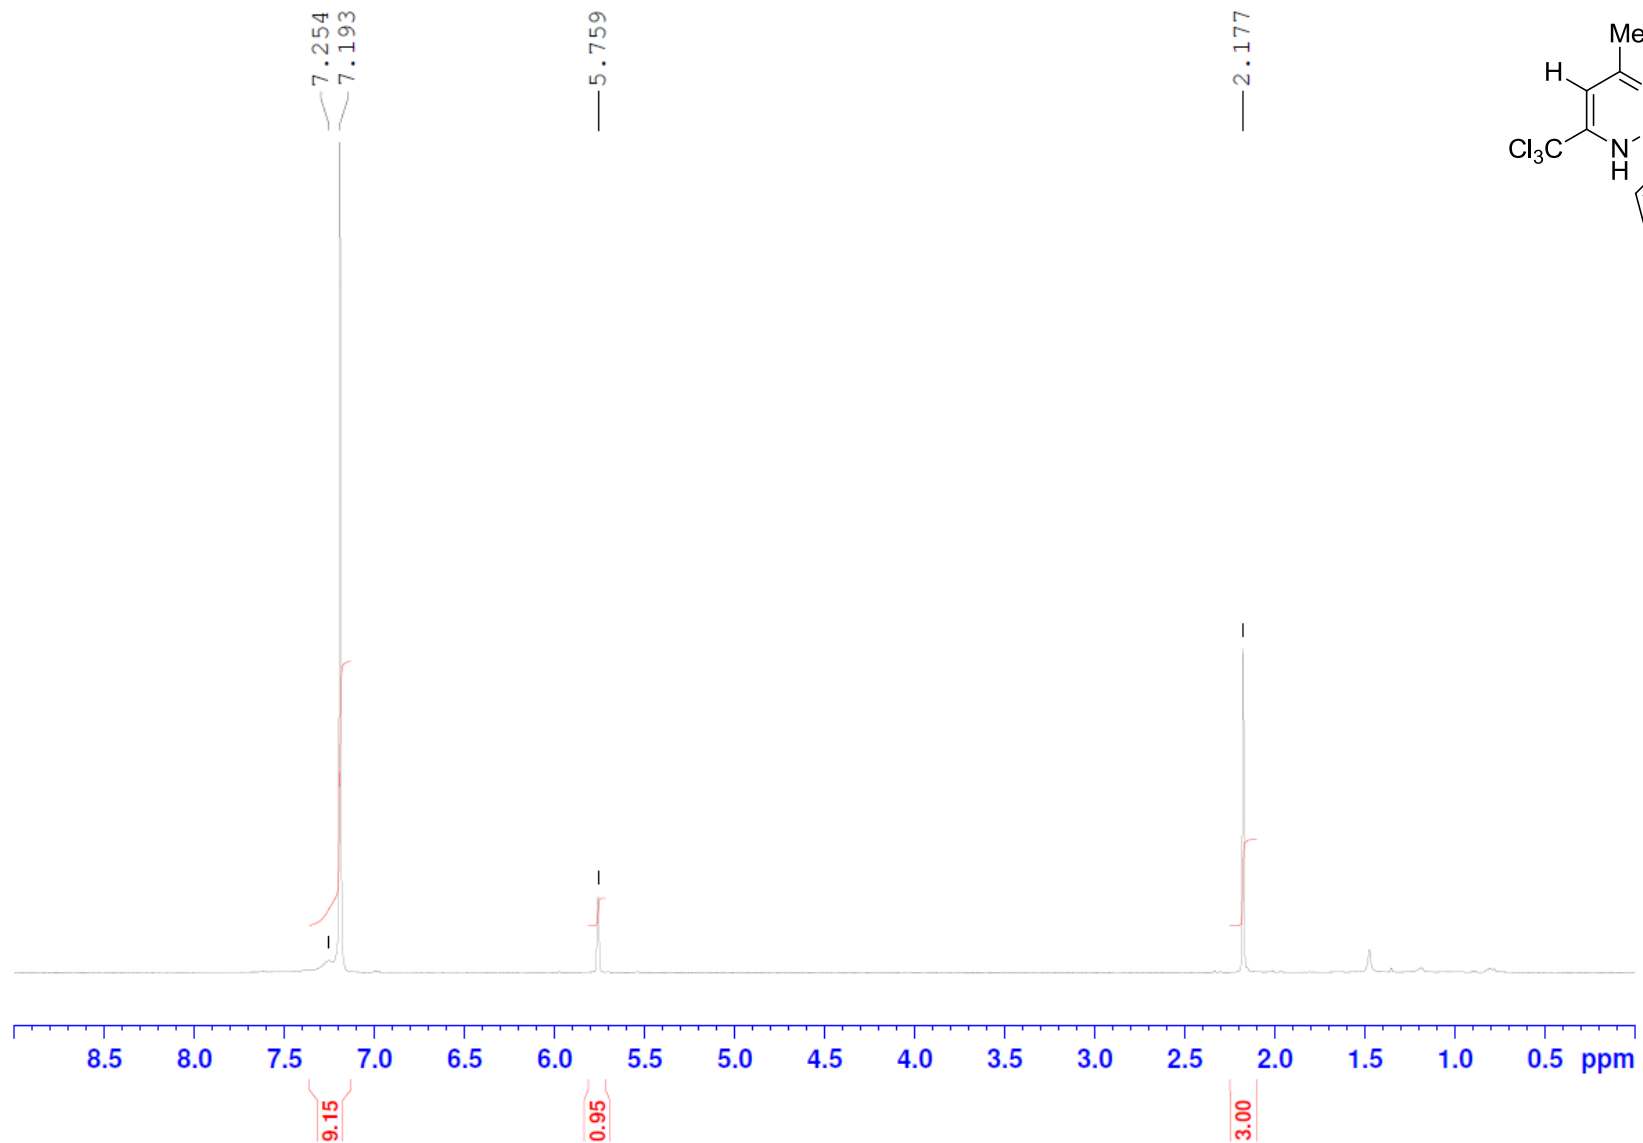

$^1\text{H}$  NMR spectrum ( $\text{CDCl}_3$ ) of 2,2-bis(4-chlorophenyl)-6-methyl-4-(trichloromethyl)-2,3-dihydro-1,3,2-oxazaborinin-1-ium-2-uide (NBC36)

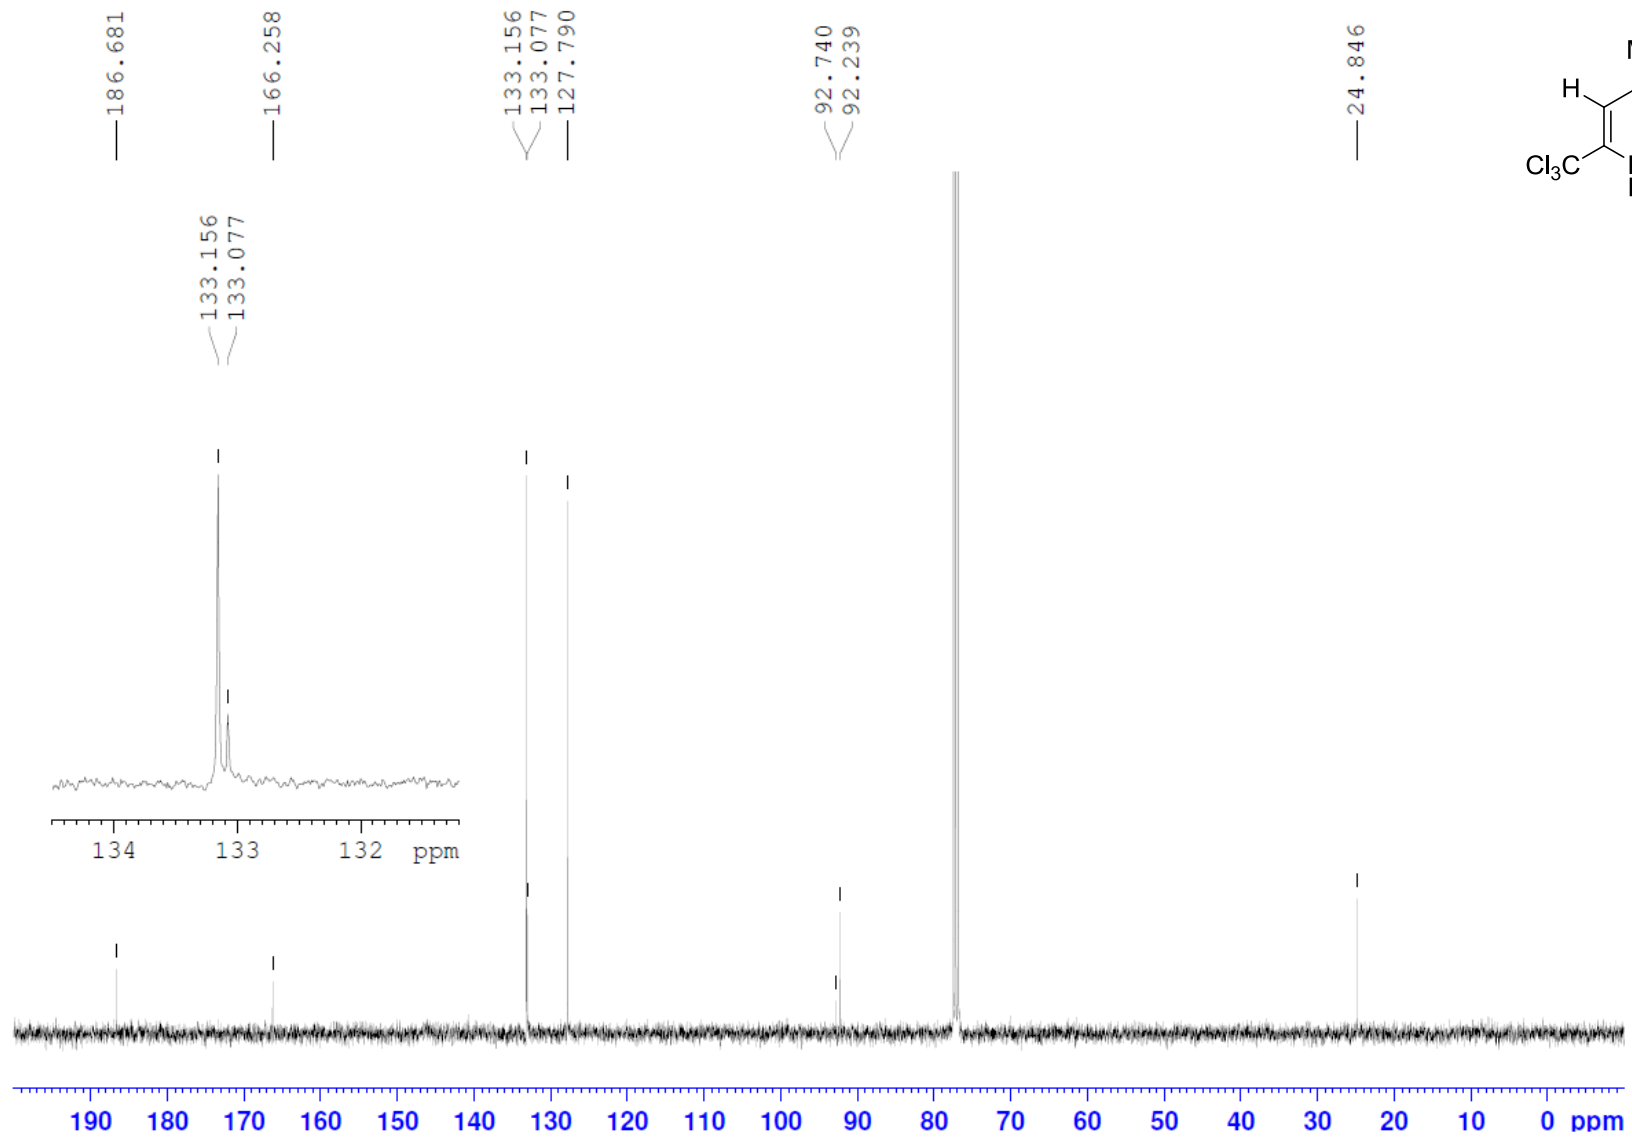

<sup>13</sup>C NMR spectrum (CDCl<sub>3</sub>) of 2,2-bis(4-chlorophenyl)-6-methyl-4-(trichloromethyl)-2,3-dihydro-1,3,2-oxazaborinin-1-ium-2-uide (NBC36)

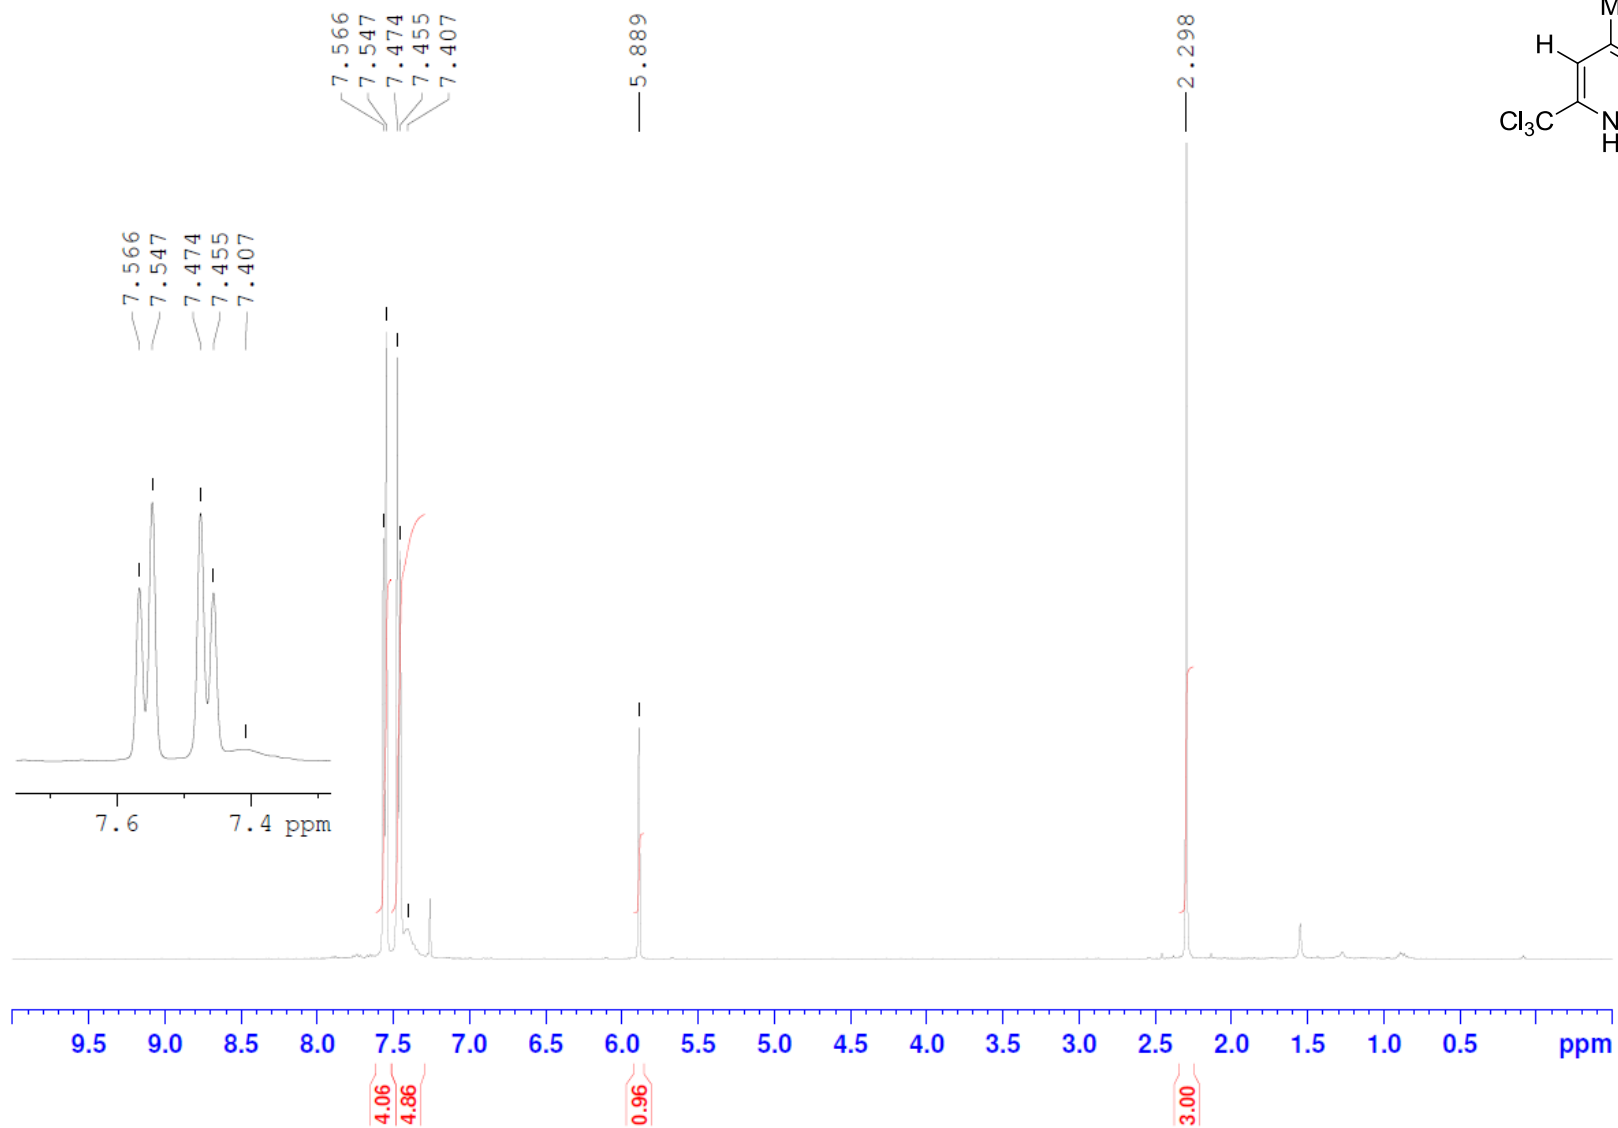

<sup>1</sup>H NMR spectrum (CDCl<sub>3</sub>) of 6-methyl-4-(trichloromethyl)-2,2-bis(4-(trifluoromethyl)phenyl)-2,3-dihydro-1,3,2-oxazaborinin-1-ium-2-uide (NBC37)



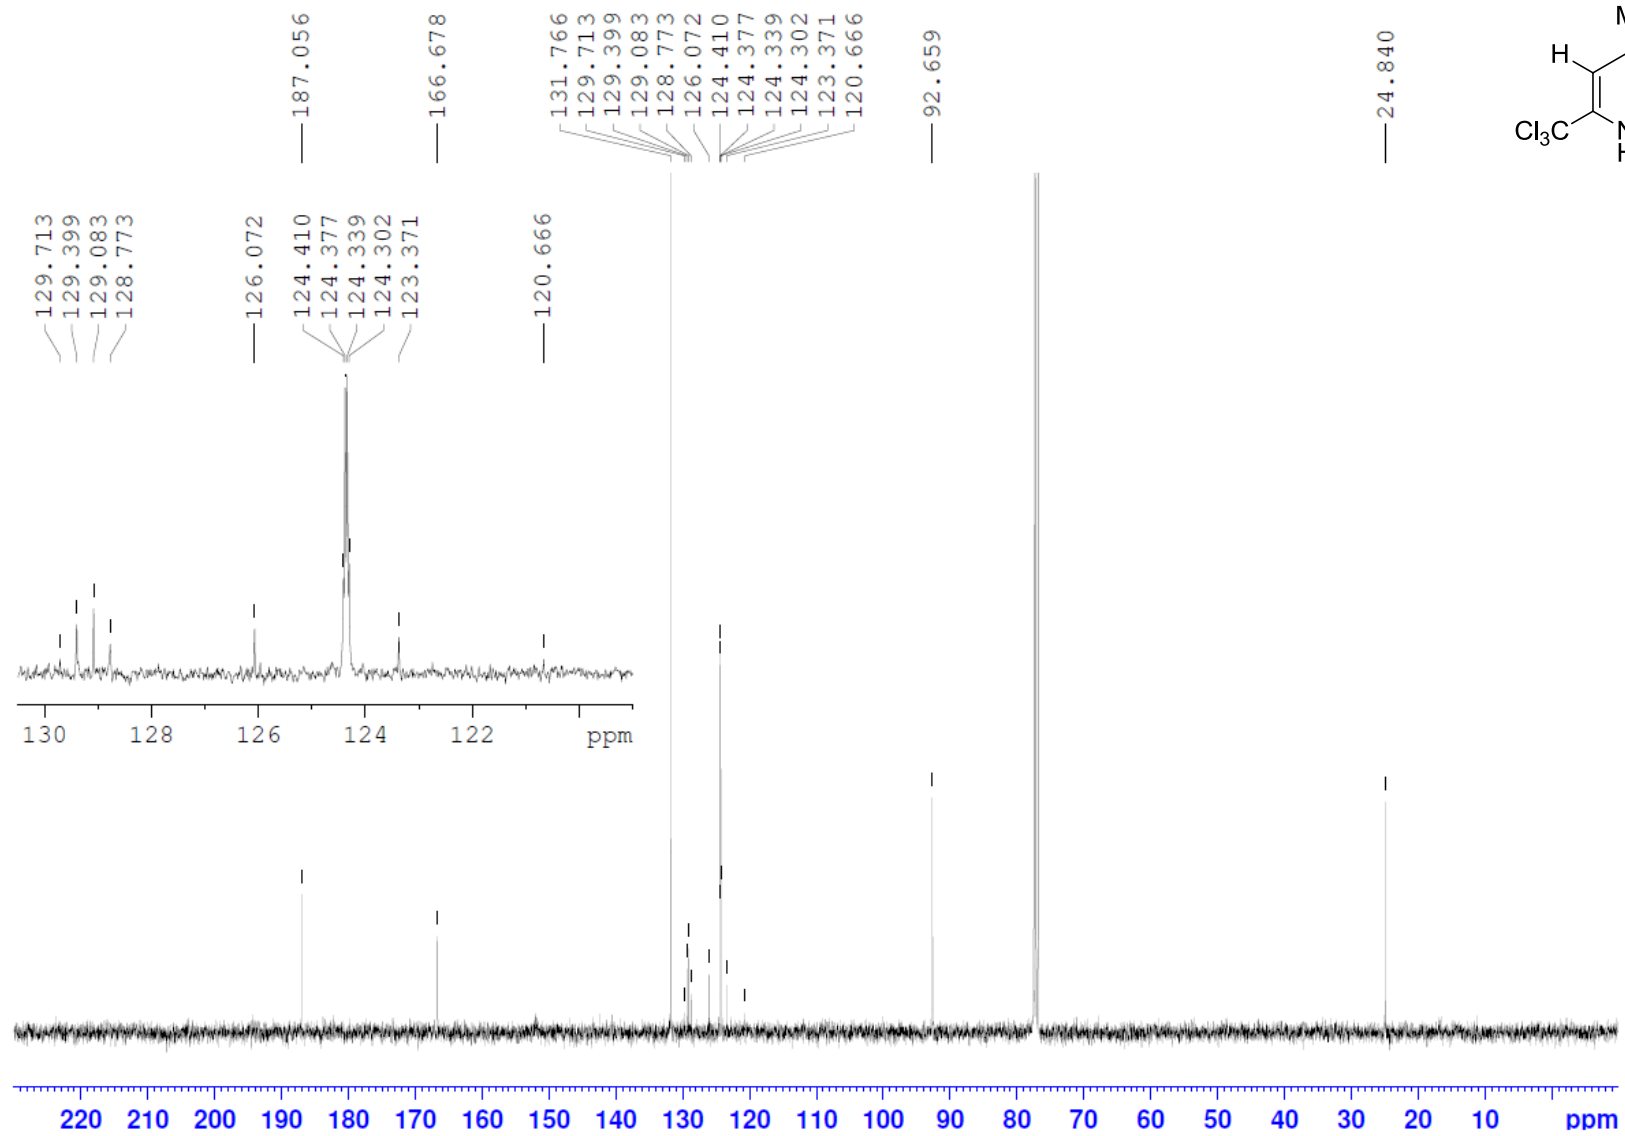

<sup>13</sup>C NMR spectrum (CDCl<sub>3</sub>) of 6-methyl-4-(trichloromethyl)-2,2-bis(4-(trifluoromethyl)phenyl)-2,3-dihydro-1,3,2-oxazaborinin-1-ium-2-uide (NBC37)

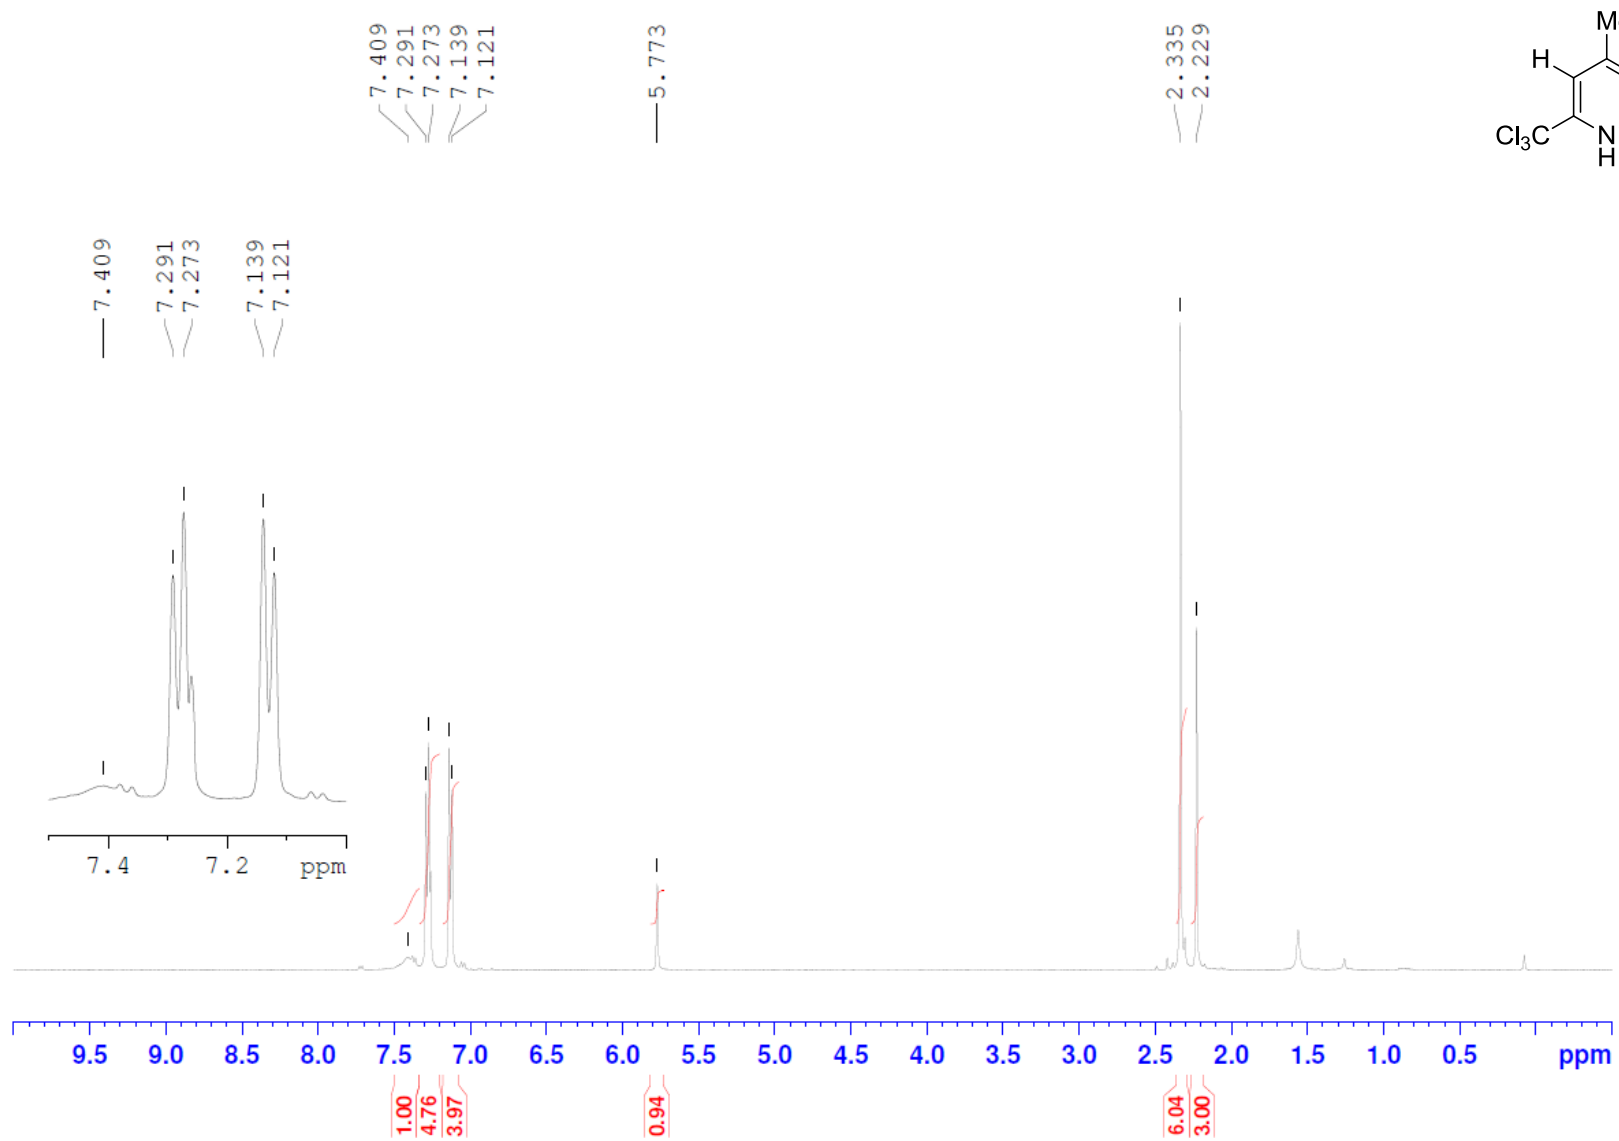

<sup>1</sup>H NMR spectrum (CDCl<sub>3</sub>) of 2,2-bis(4-methylphenyl)-6-methyl-4-(trichloromethyl)-2,3-dihydro-1,3,2-oxazaborinin-1-ium-2-uide (NBC38)

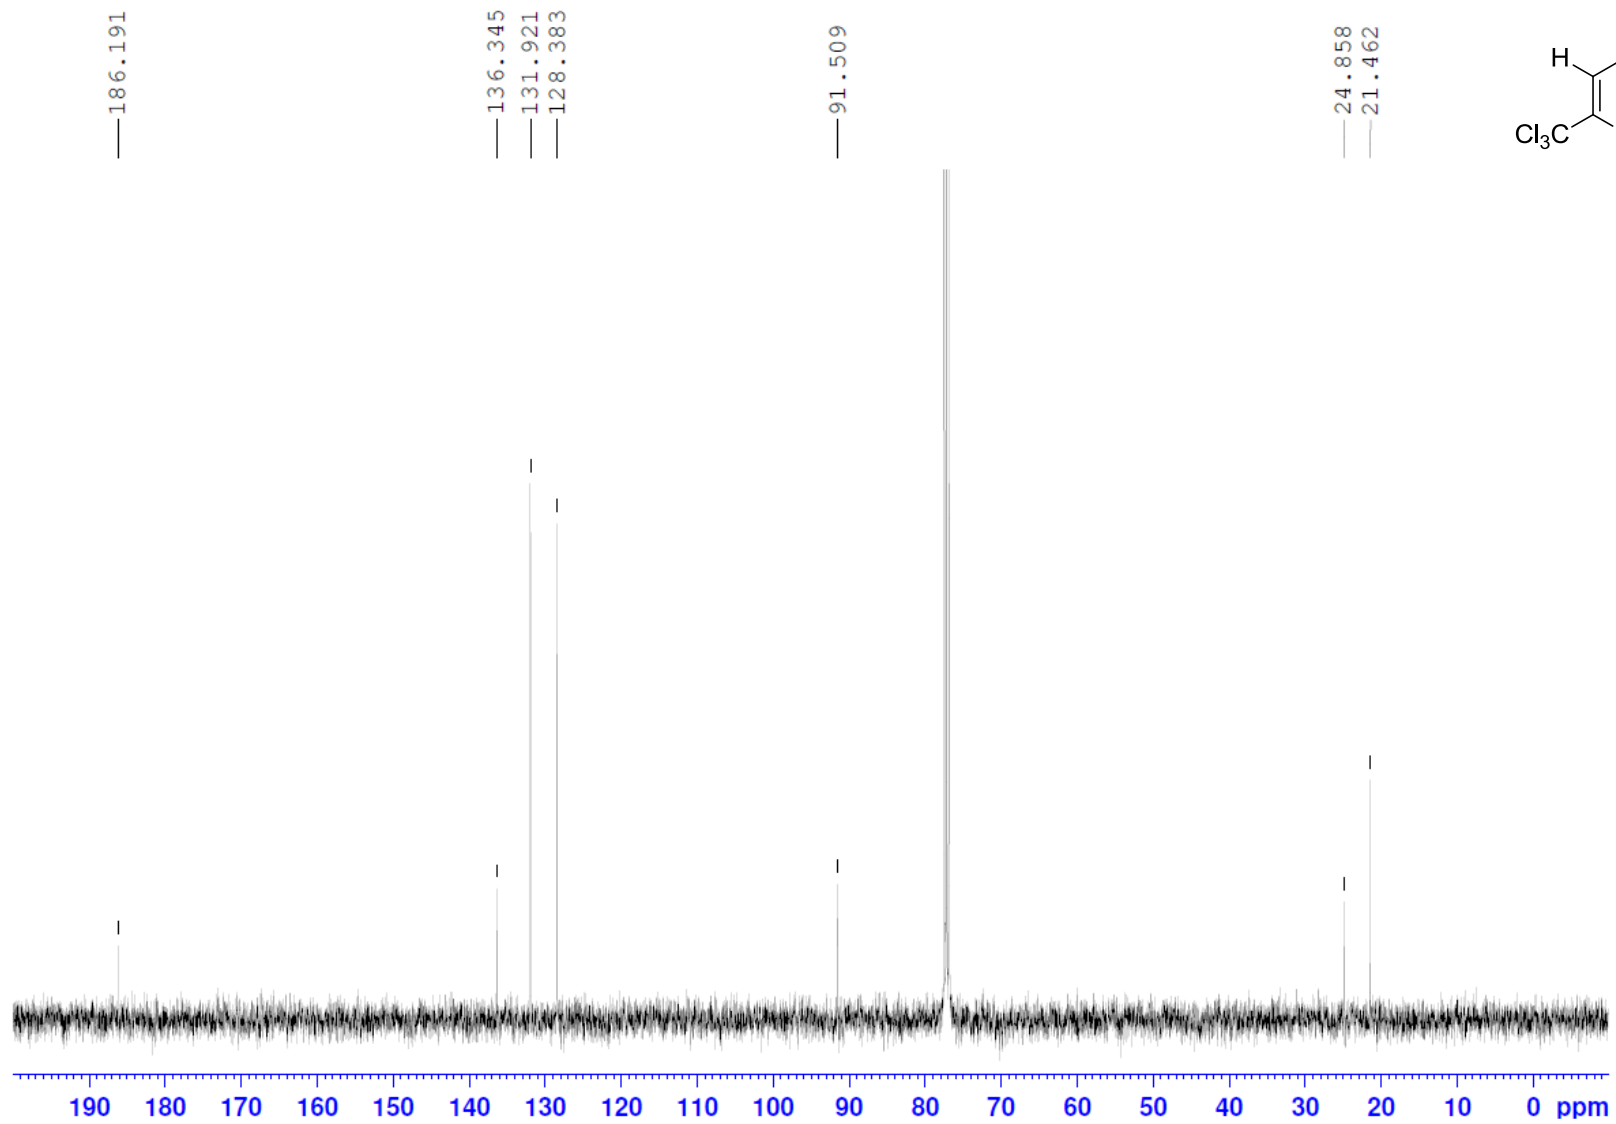

<sup>13</sup>C NMR spectrum (CDCl<sub>3</sub>) of 2,2-bis(4-methylphenyl)-6-methyl-4-(trichloromethyl)-2,3-dihydro-1,3,2-oxazaborinin-1-ium-2-uide (NBC38)

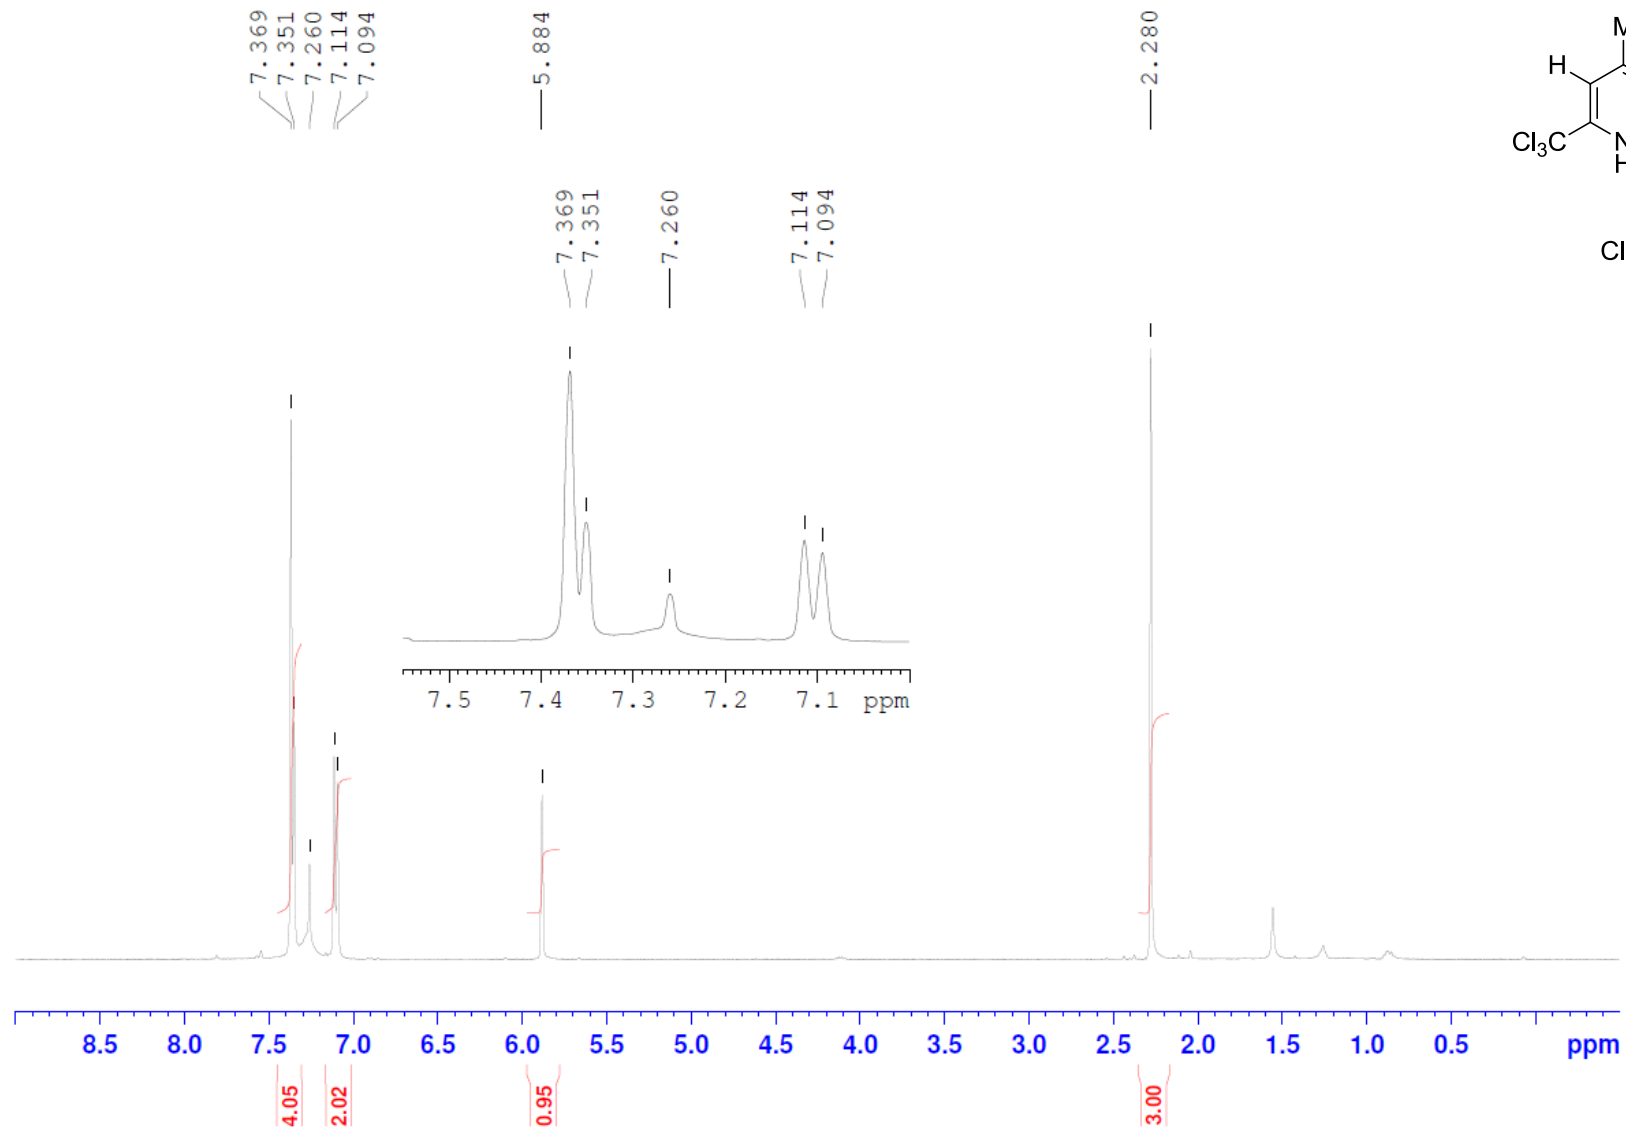

<sup>1</sup>H NMR spectrum (CDCl<sub>3</sub>) of 2,2-bis(3,4-dichlorophenyl)-6-methyl-4-(trichloromethyl)-2,3-dihydro-1,3,2-oxazaborinin-1-ium-2-uide (NBC39)

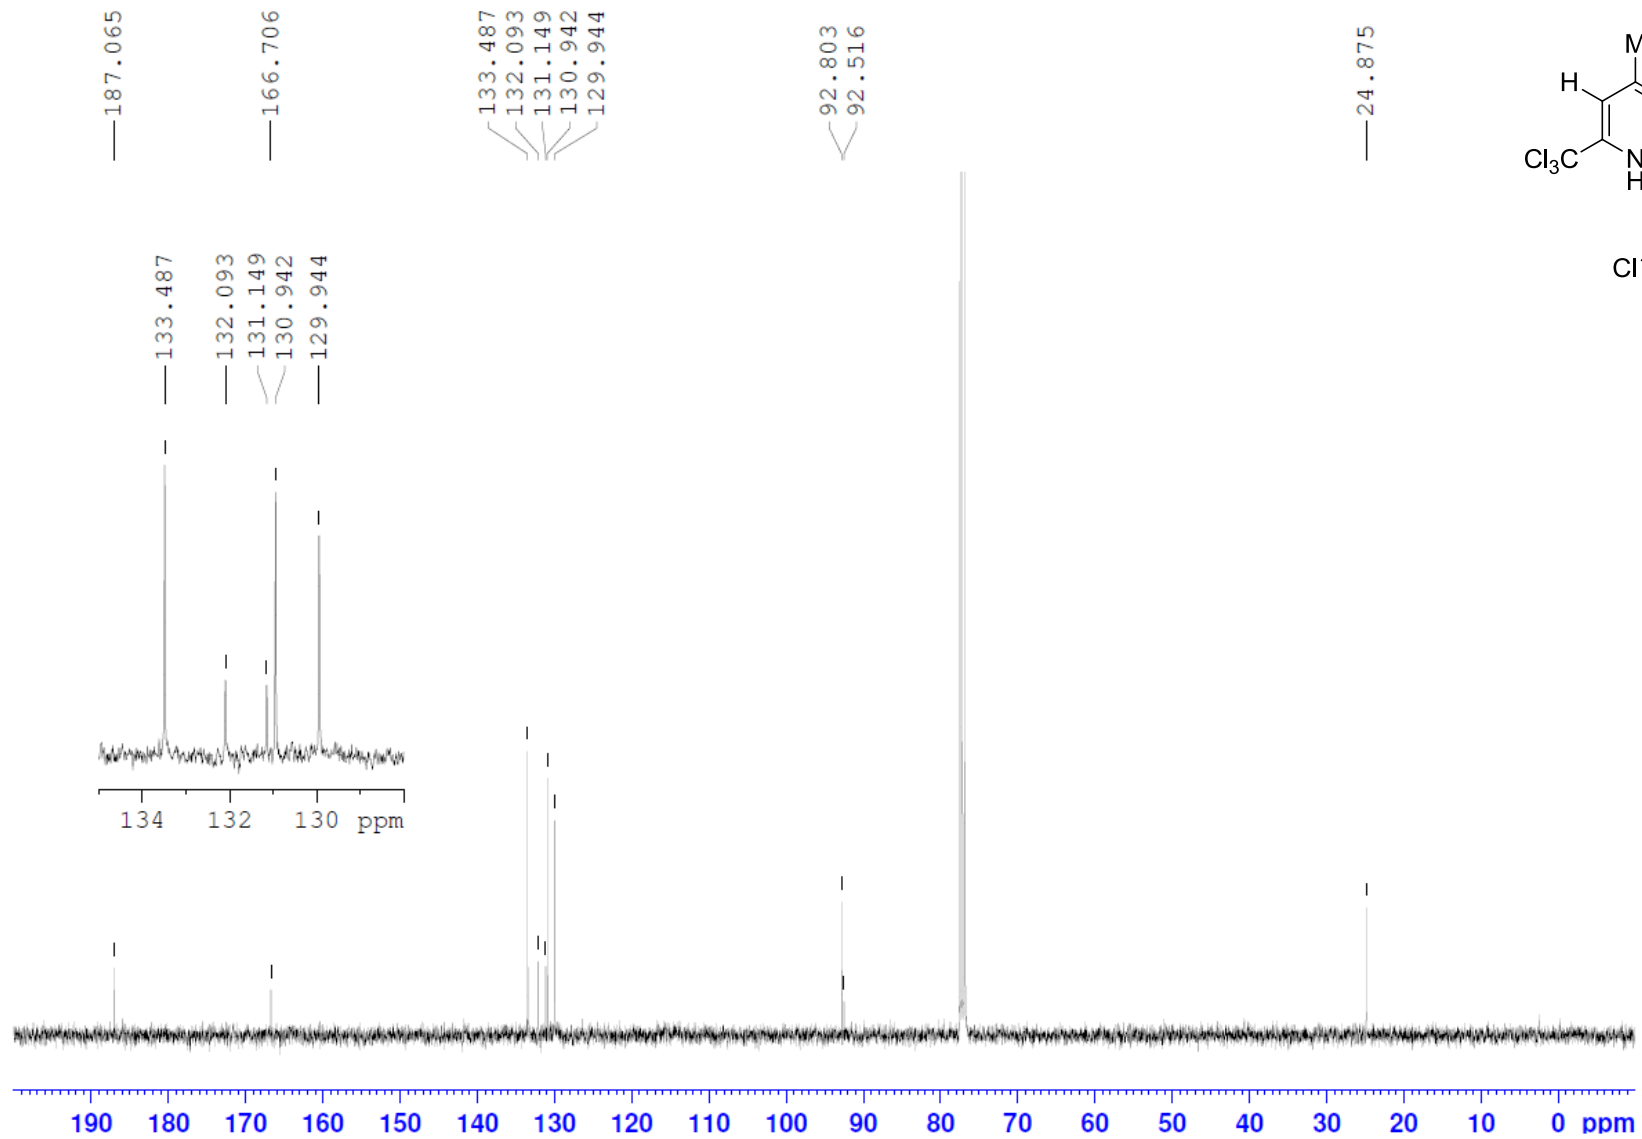

<sup>13</sup>C NMR spectrum (CDCl<sub>3</sub>) of 2,2-bis(3,4-dichlorophenyl)-6-methyl-4-(trichloromethyl)-2,3-dihydro-1,3,2-oxazaborinin-1-ium-2-uide (NBC39)

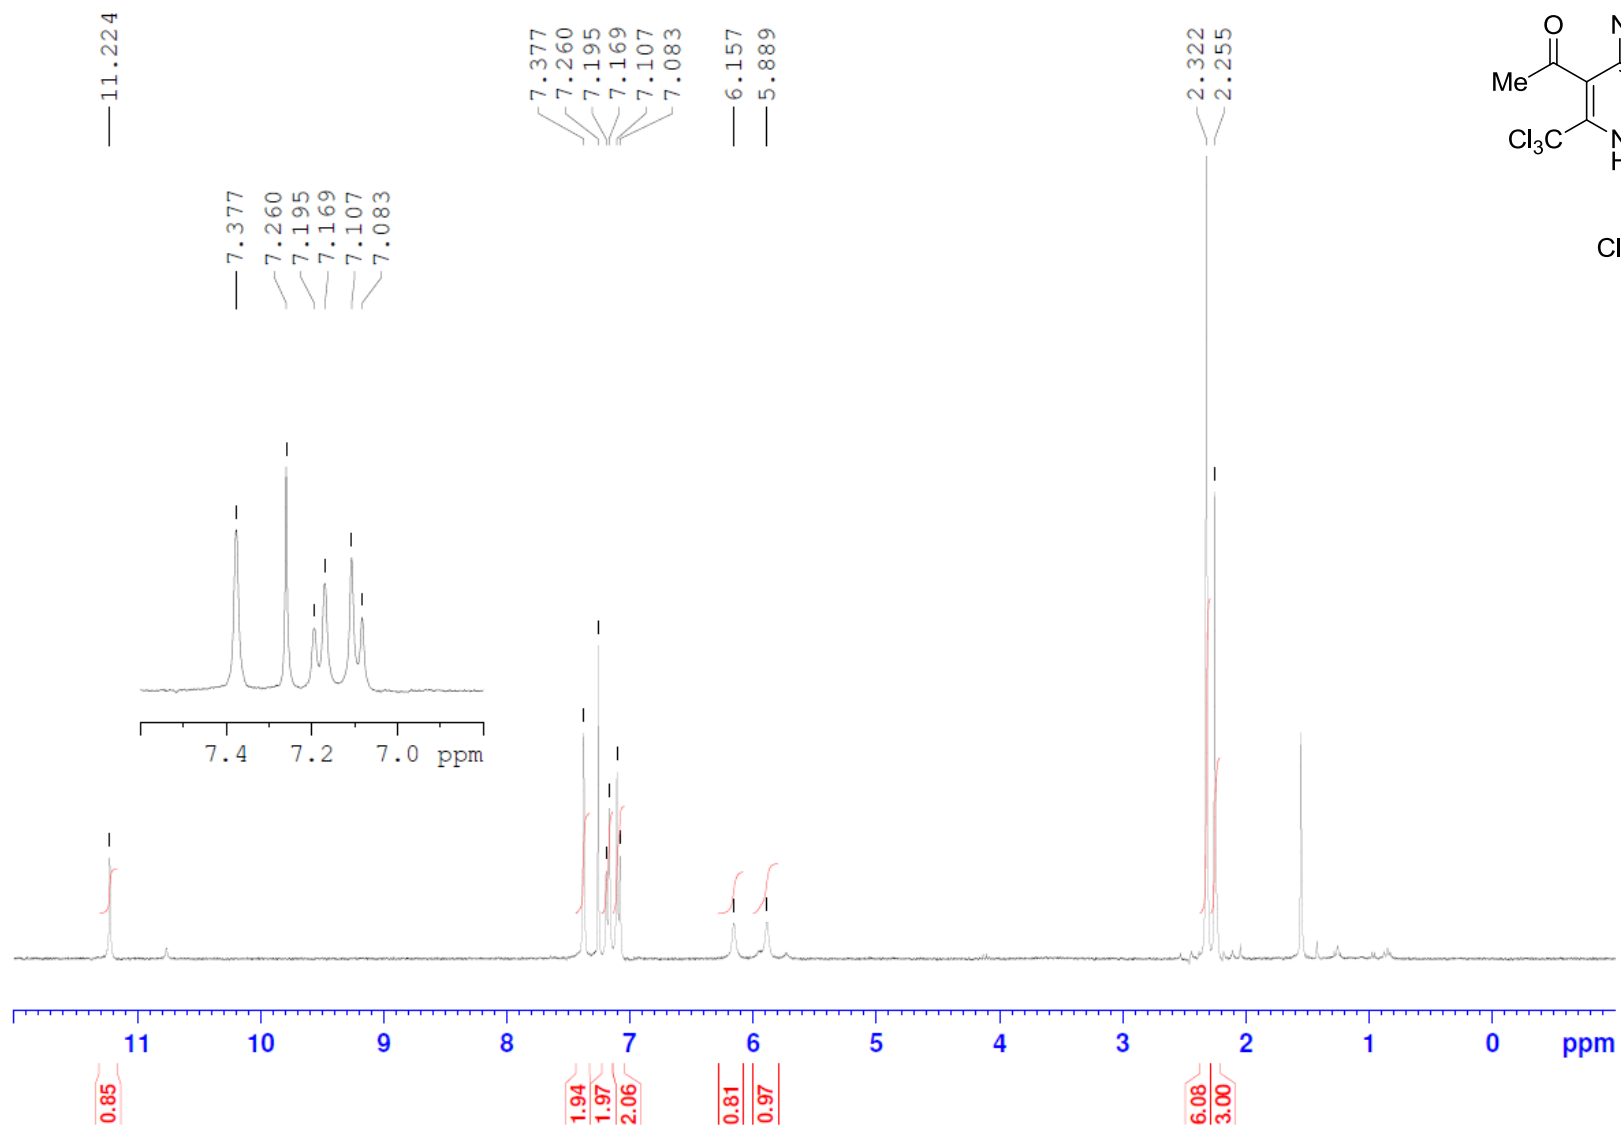

<sup>1</sup>H NMR spectrum (CDCl<sub>3</sub>) of 5-acetyl-6-amino-2,2-bis(3-chloro-4-methylphenyl)-4-(trichloromethyl)-2,3-dihydro-1,3,2-oxazaborinin-1-ium-2-uide (NBC40)

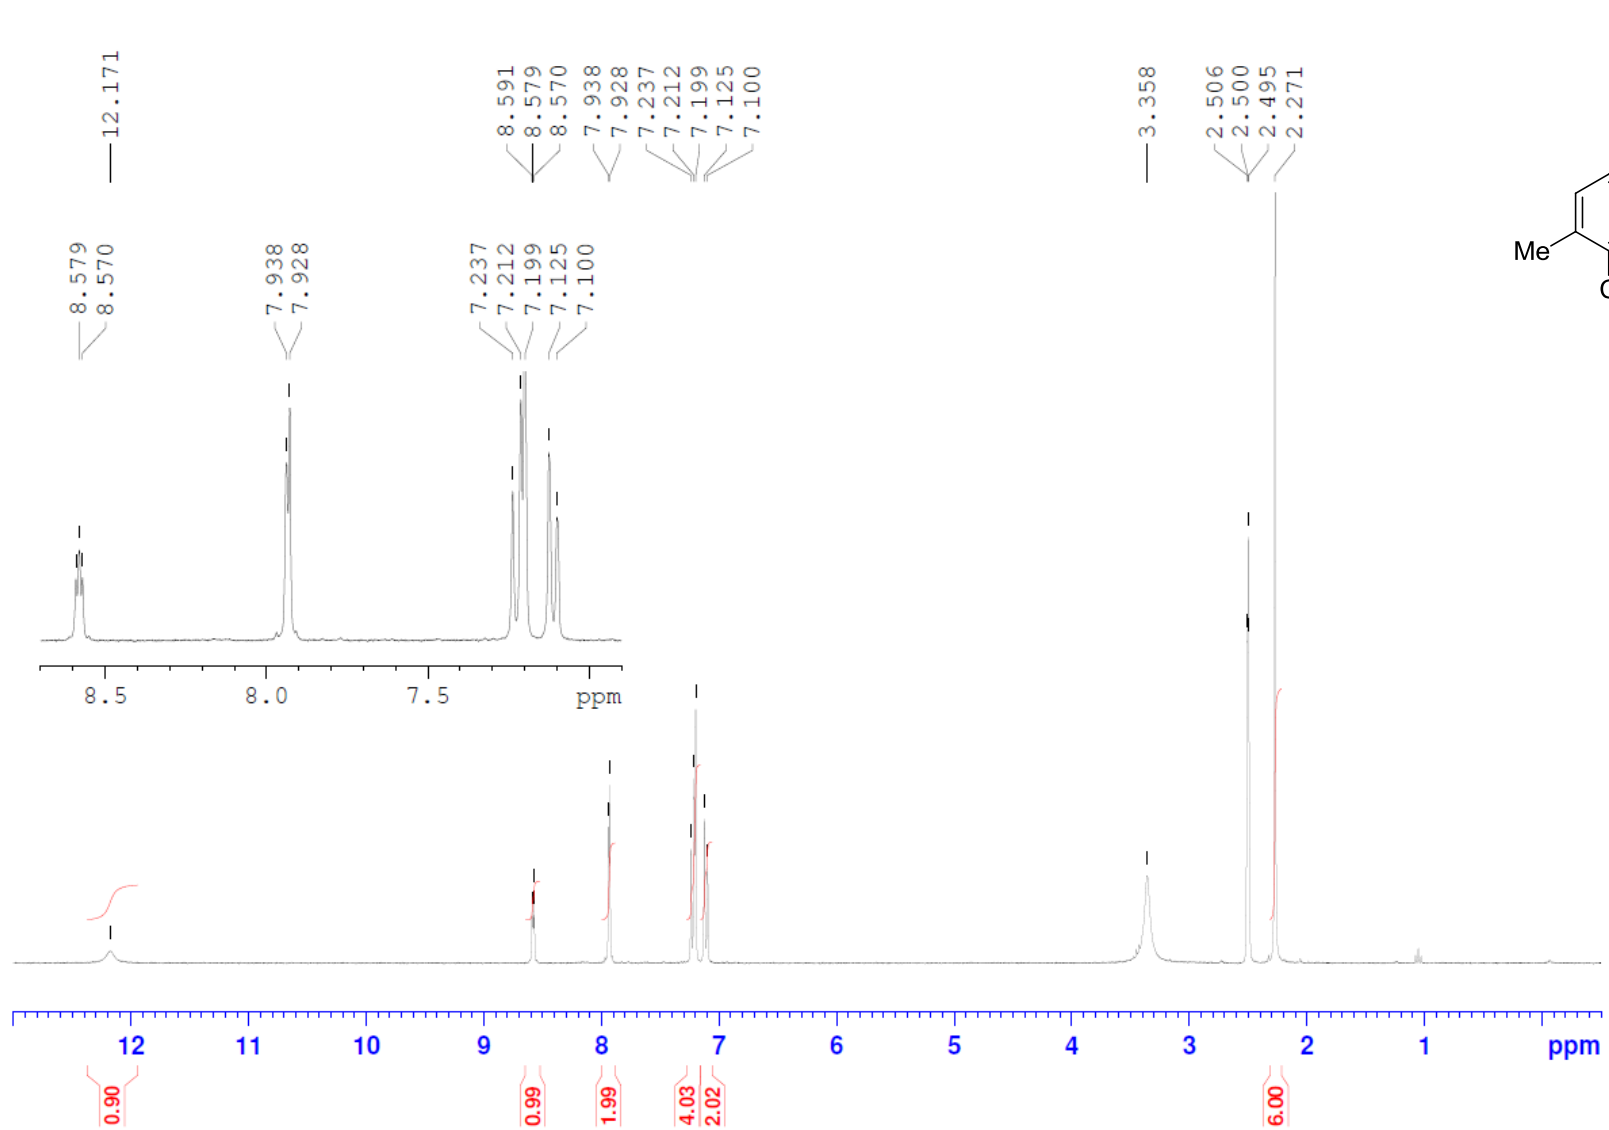

$^1\text{H}$  NMR spectrum (DMSO- $d_6$ ) of 3-hydroxypyridine-2-carboxyloxy-bis(3-chloro-4-methylphenyl) borane (AN0128)

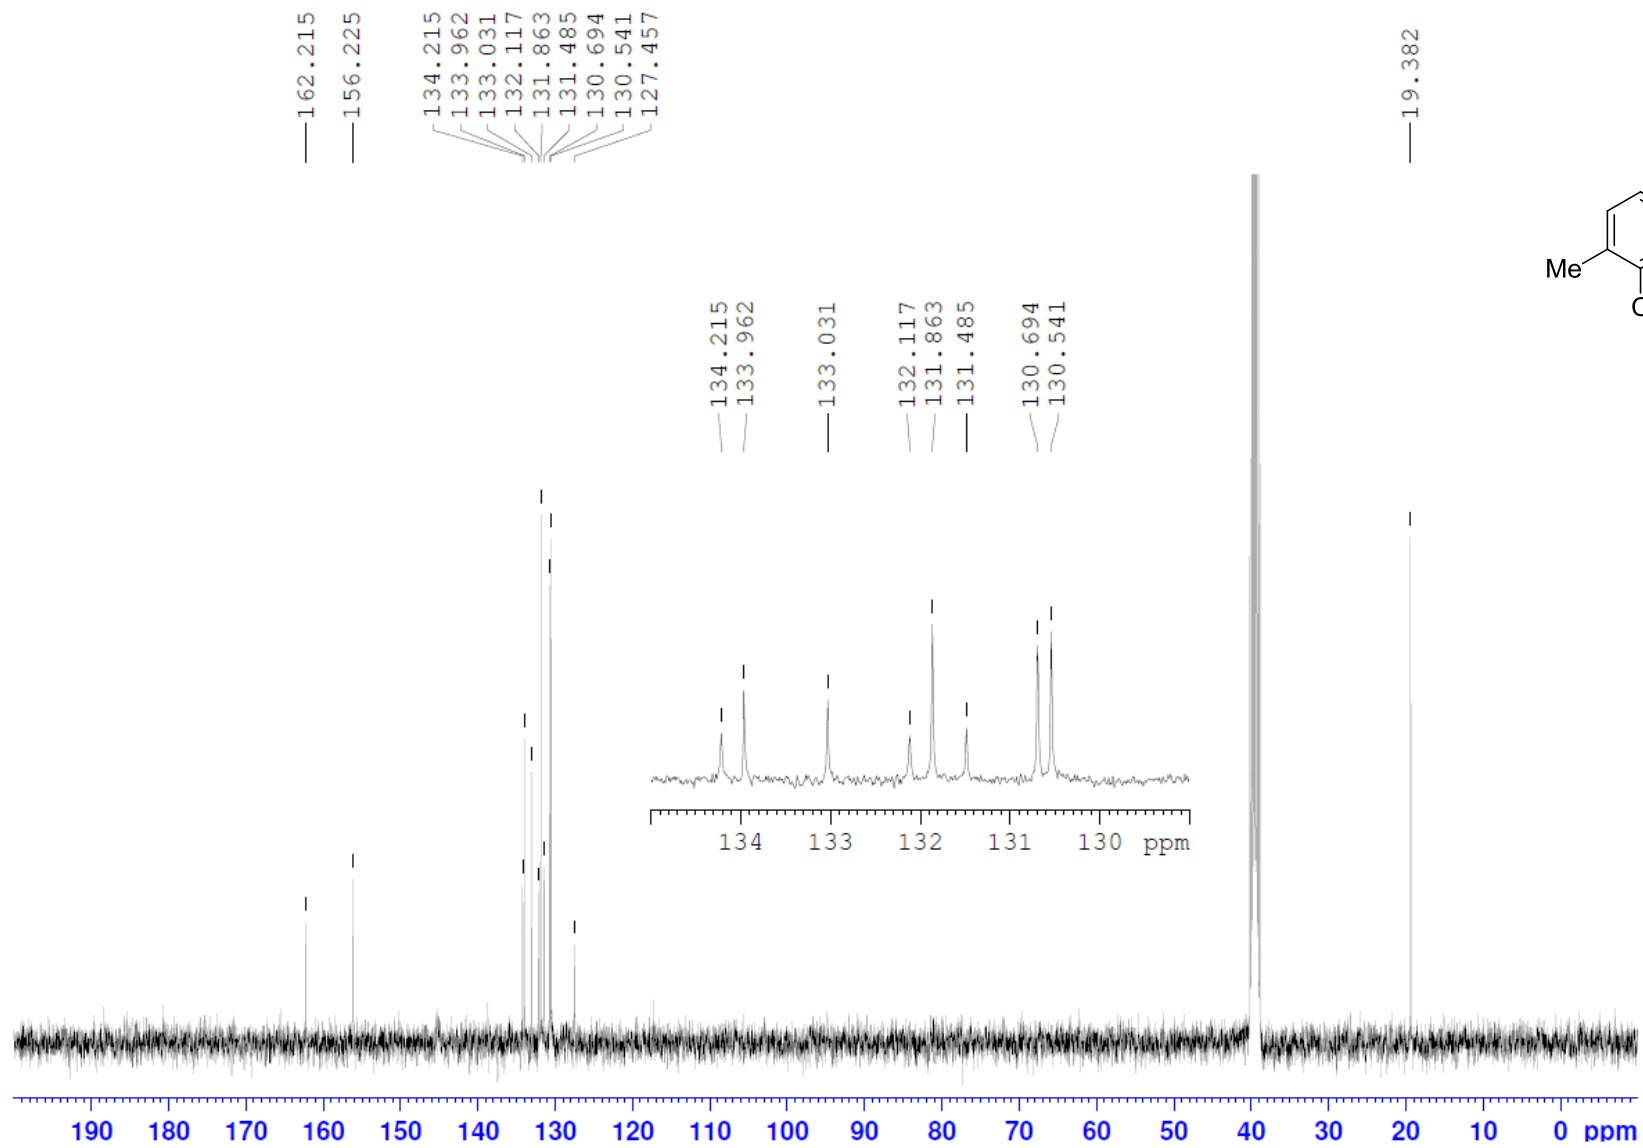

<sup>13</sup>C NMR spectrum (DMSO-d<sub>6</sub>) of 3-hydroxypyridine-2-carboxyloxy-bis(3-chloro-4-methylphenyl) borane (AN0128)



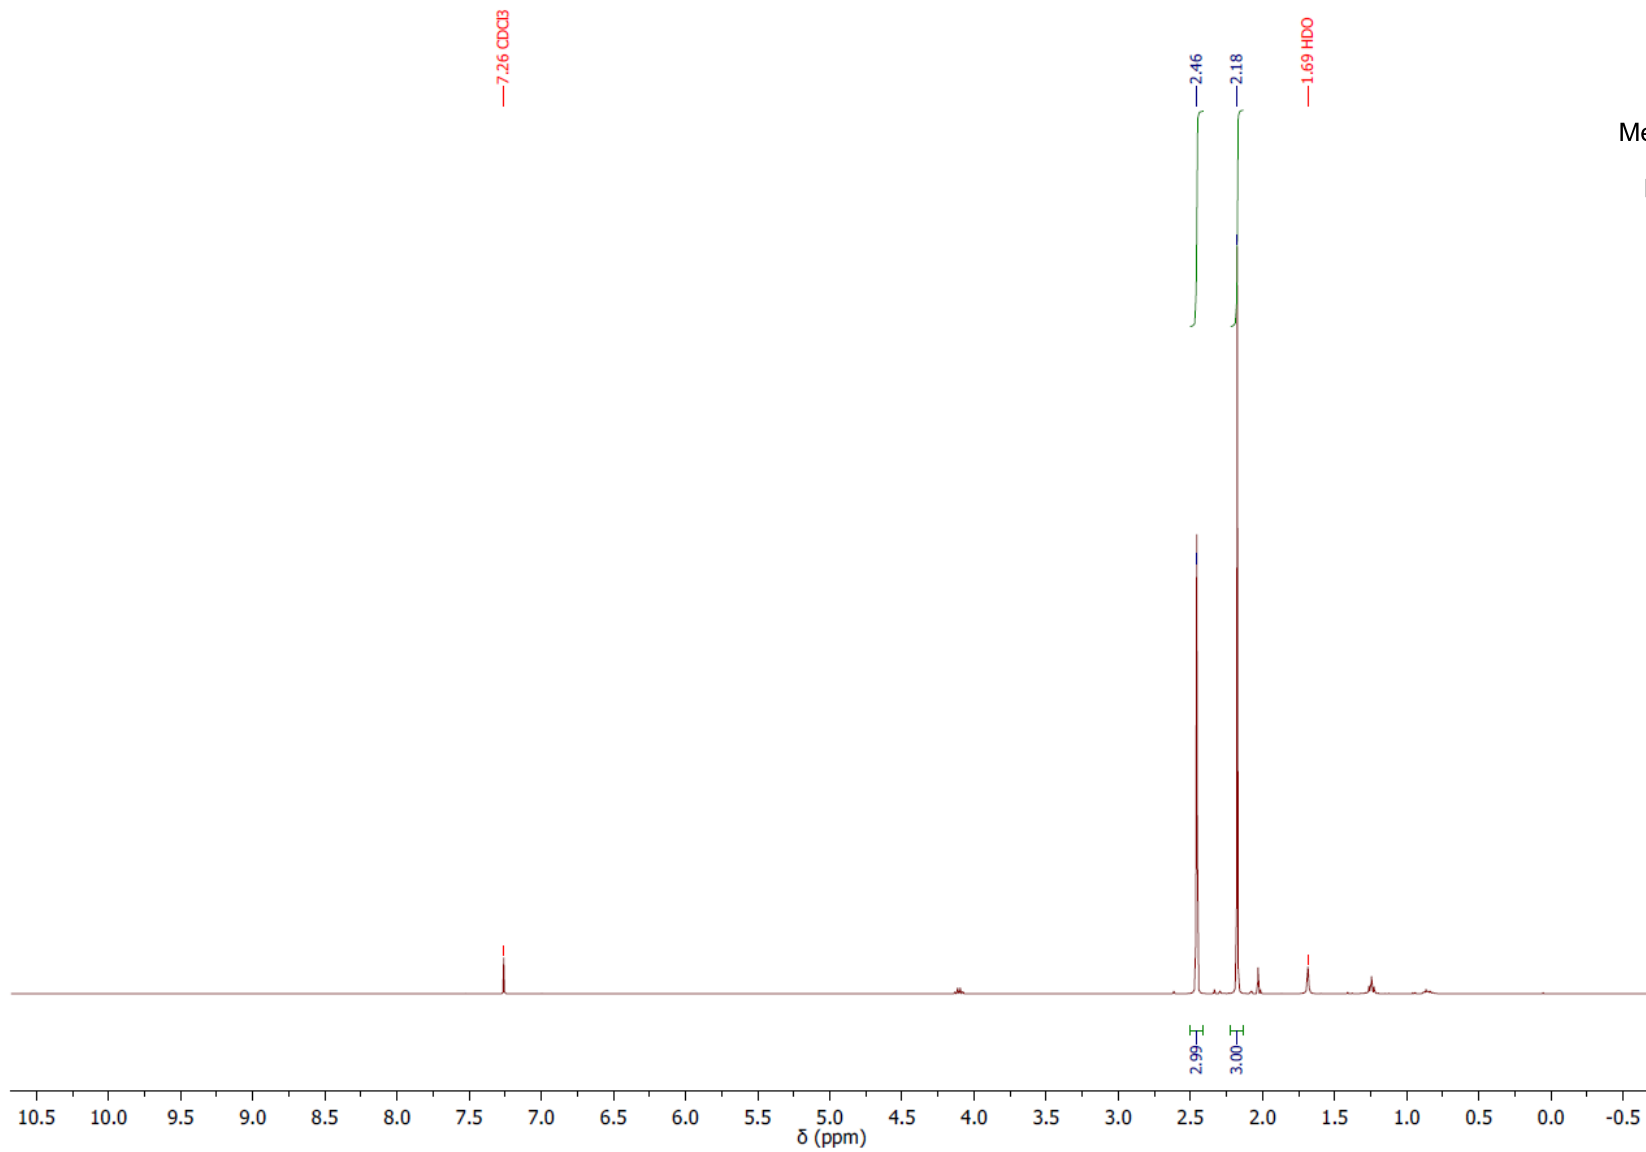

<sup>1</sup>H NMR spectrum (CDCl<sub>3</sub>) of 3-(1-amino-2,2,2-trifluoroethylidene)pentane-2,4-dione (**8**)

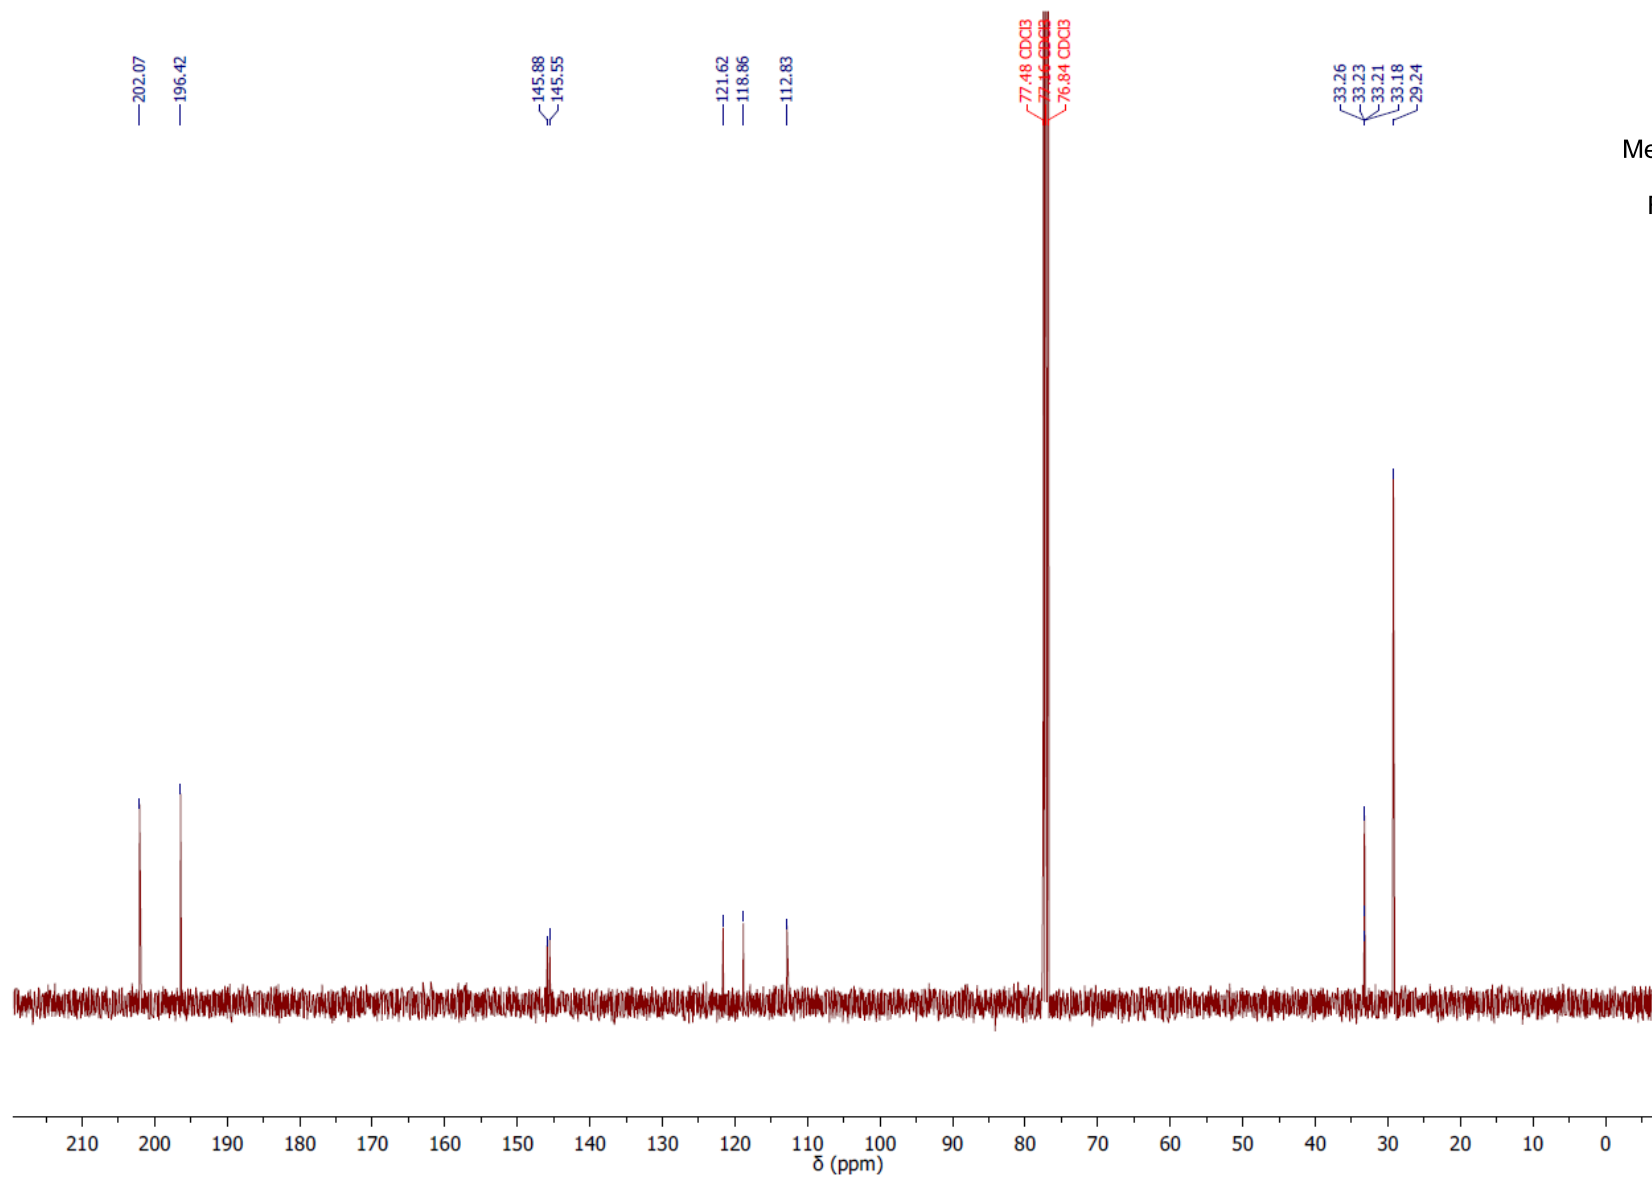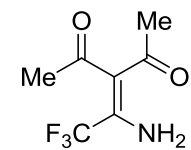

<sup>13</sup>C NMR spectrum (CDCl<sub>3</sub>) of 3-(1-amino-2,2,2-trifluoroethylidene)pentane-2,4-dione (**8**)

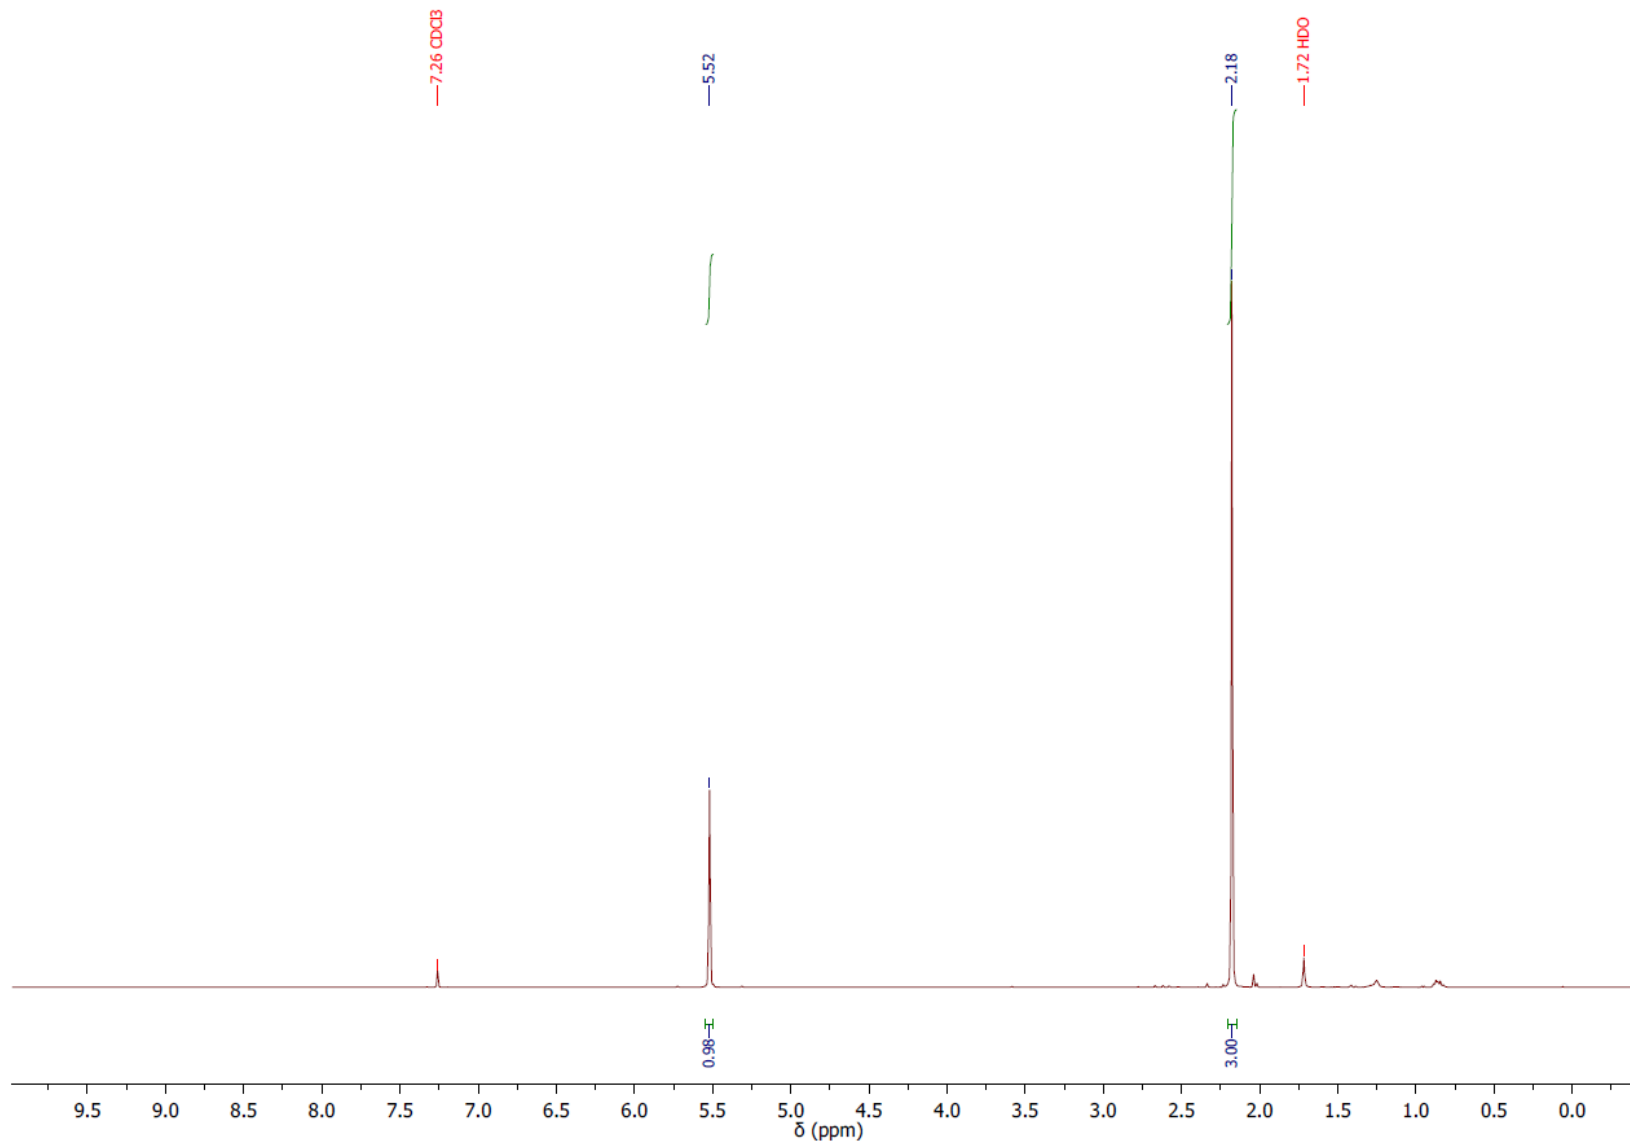

$^1\text{H}$  NMR spectrum ( $\text{CDCl}_3$ ) of (Z)-4-amino-5,5,5-trifluoropent-3-en-2-one (**10**)

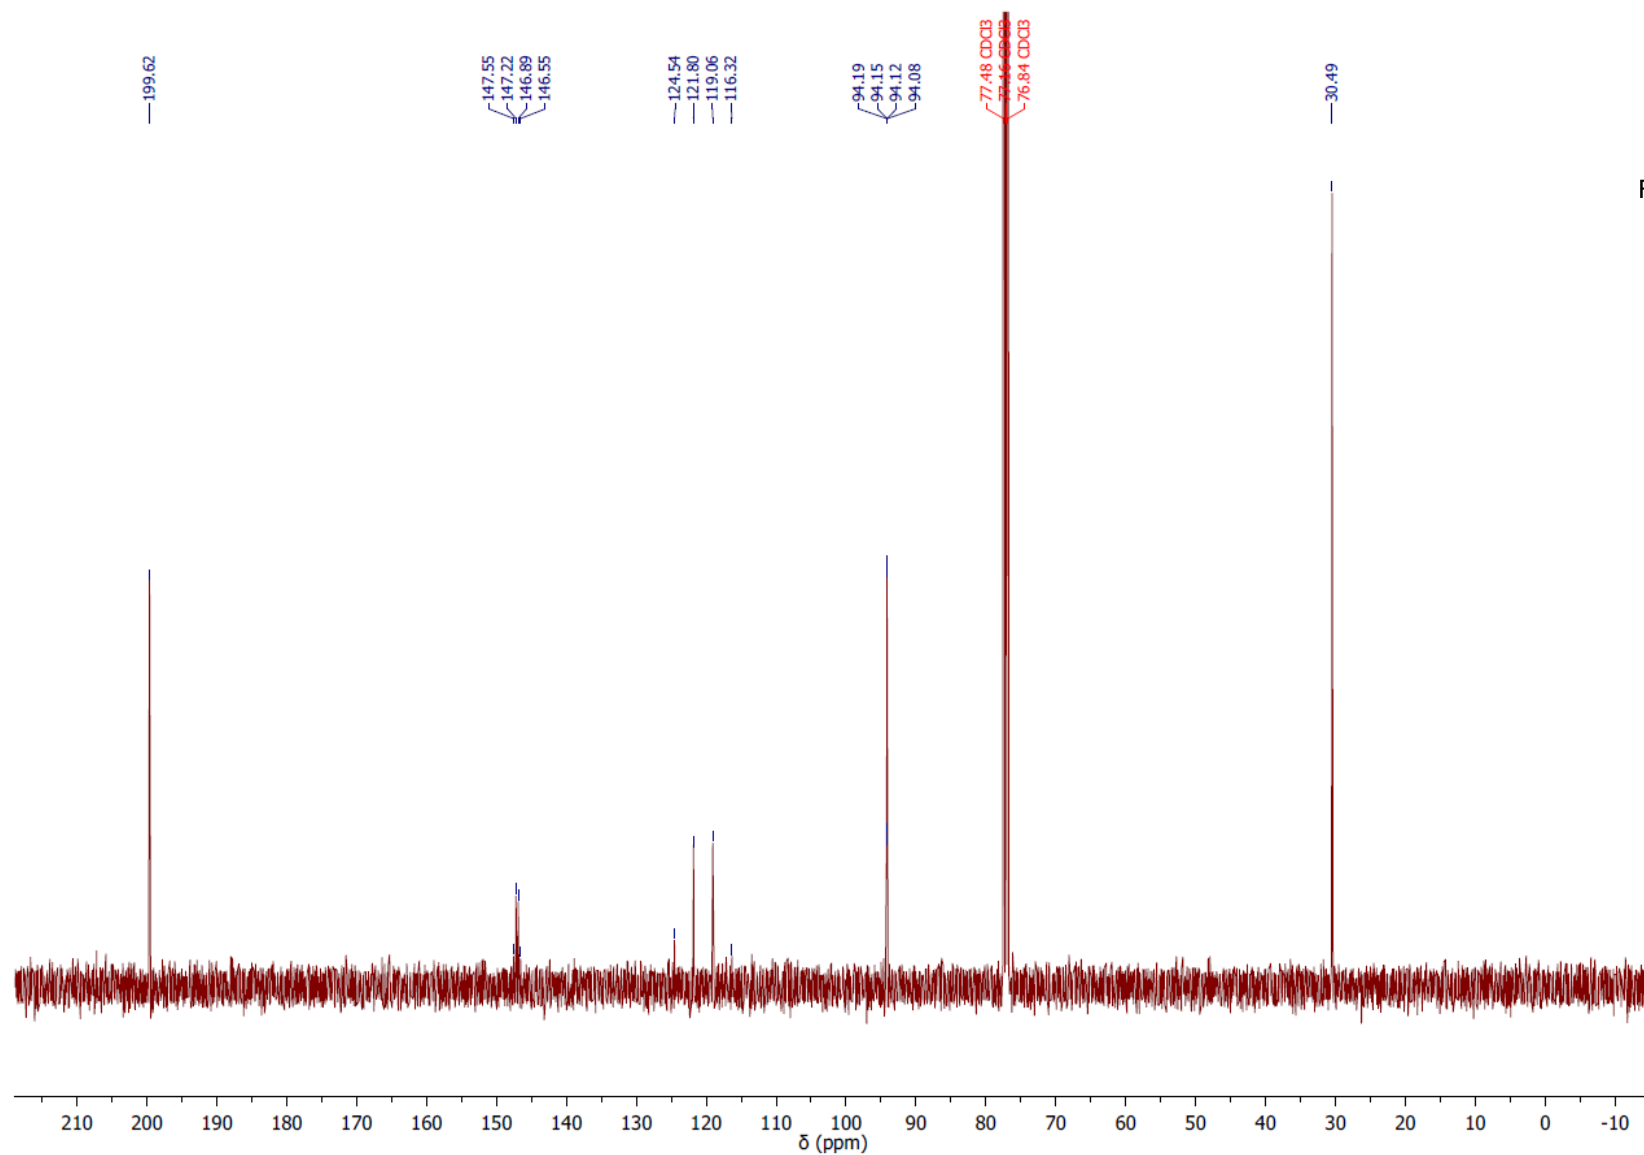

$^{13}\text{C}$  NMR spectrum ( $\text{CDCl}_3$ ) of (*Z*)-4-amino-5,5,5-trifluoropent-3-en-2-one (**10**)

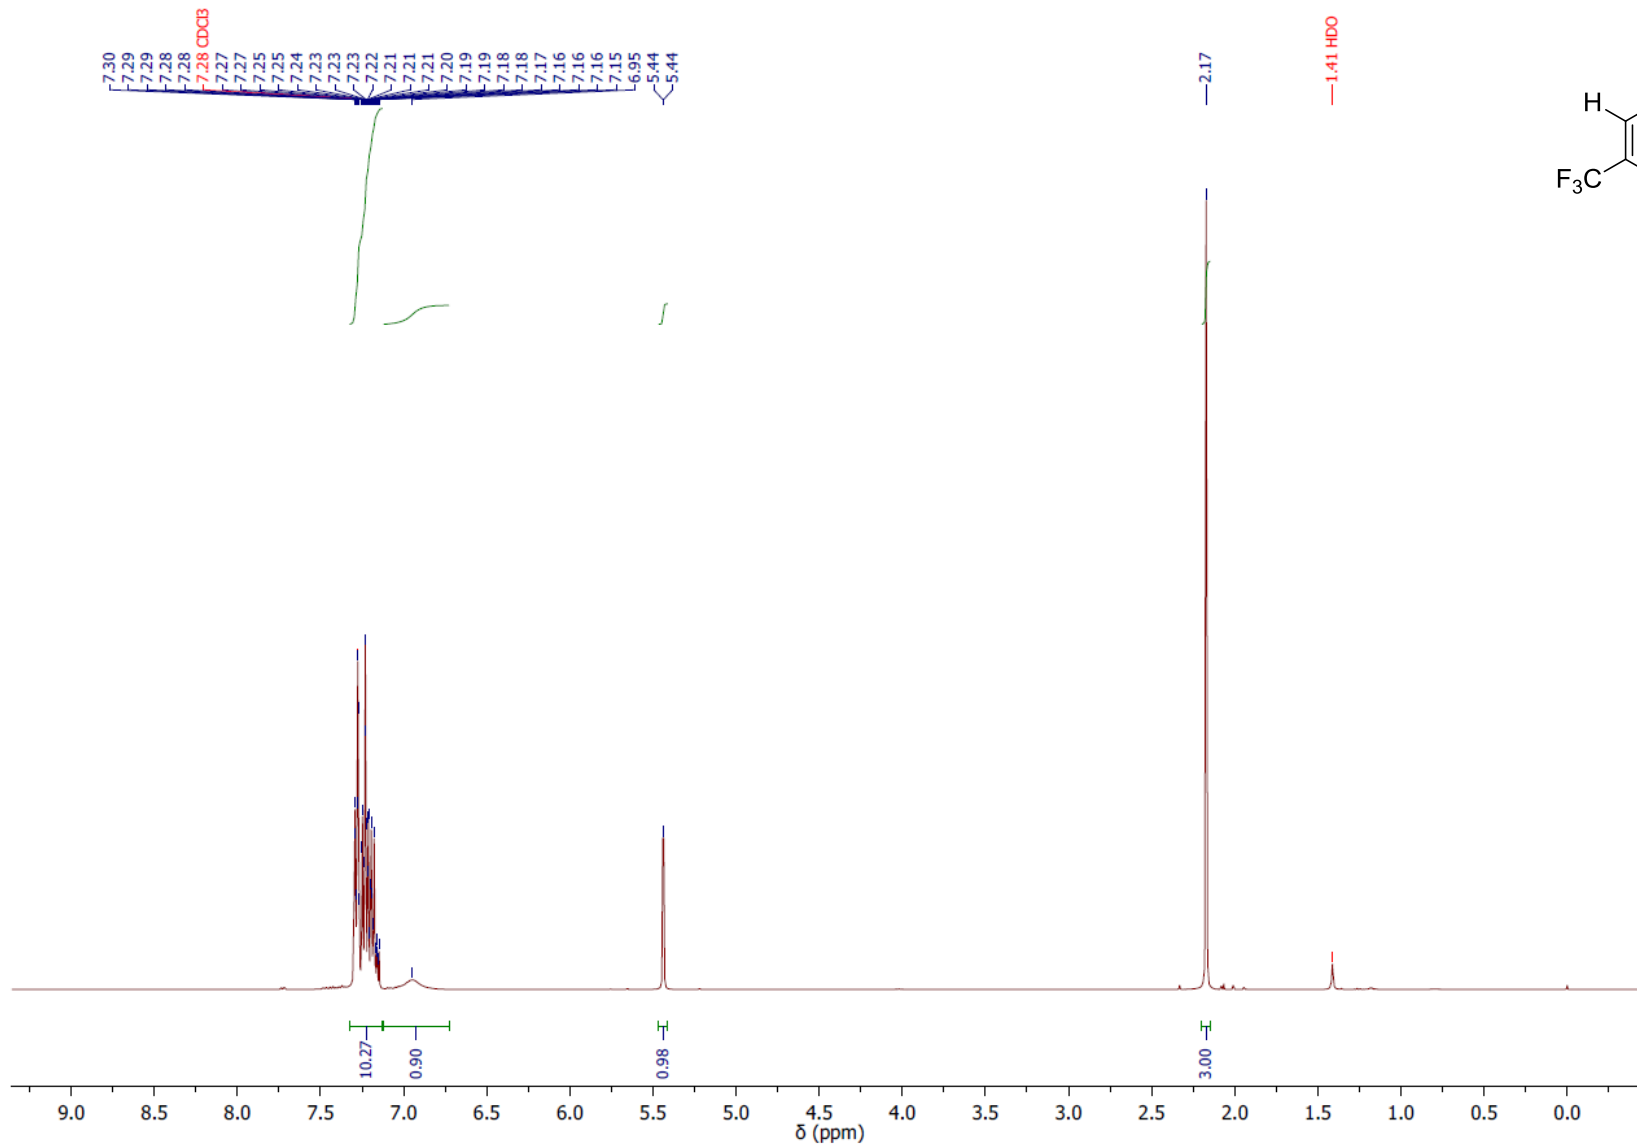

<sup>1</sup>H NMR spectrum (CDCl<sub>3</sub>) of 6-methyl-2,2-diphenyl-4-(trifluoromethyl)-2,3-dihydro-1,3,2-oxazaborinin-1-ium-2-uide (NBC41)

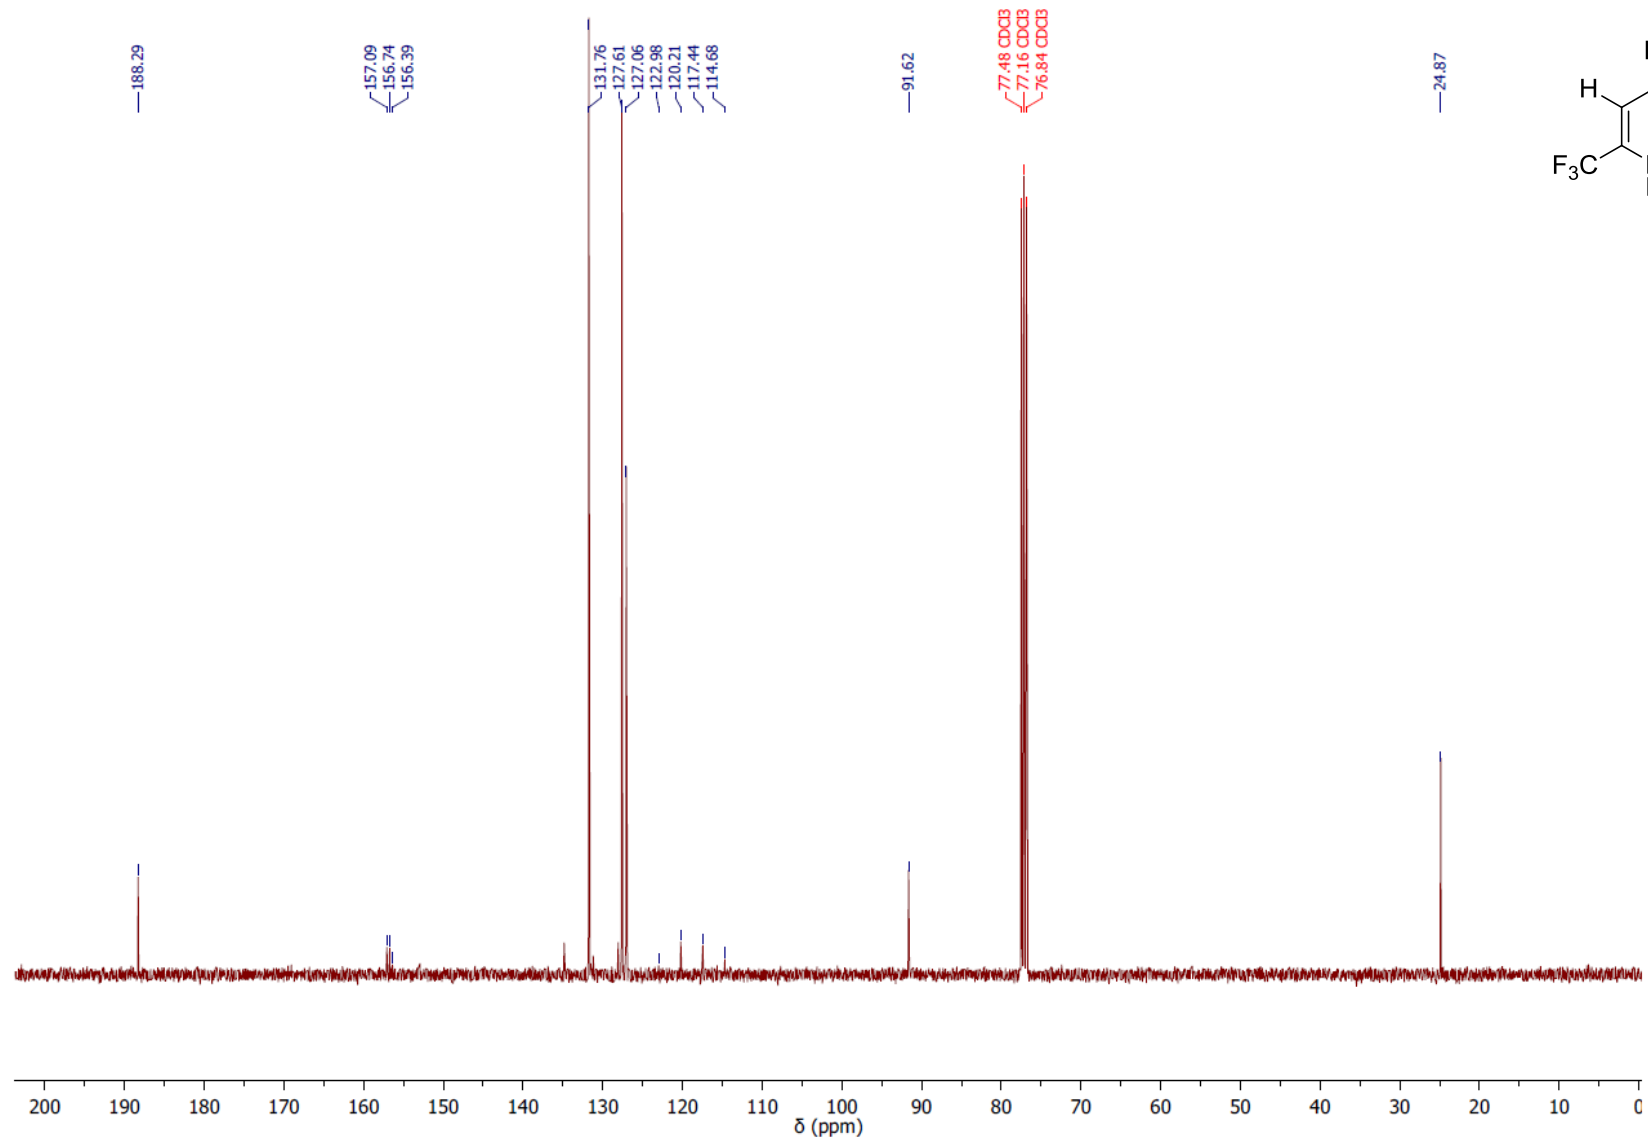

<sup>13</sup>C NMR spectrum (CDCl<sub>3</sub>) of 6-methyl-2,2-diphenyl-4-(trifluoromethyl)-2,3-dihydro-1,3,2-oxazaborinin-1-ium-2-uide (NBC41)

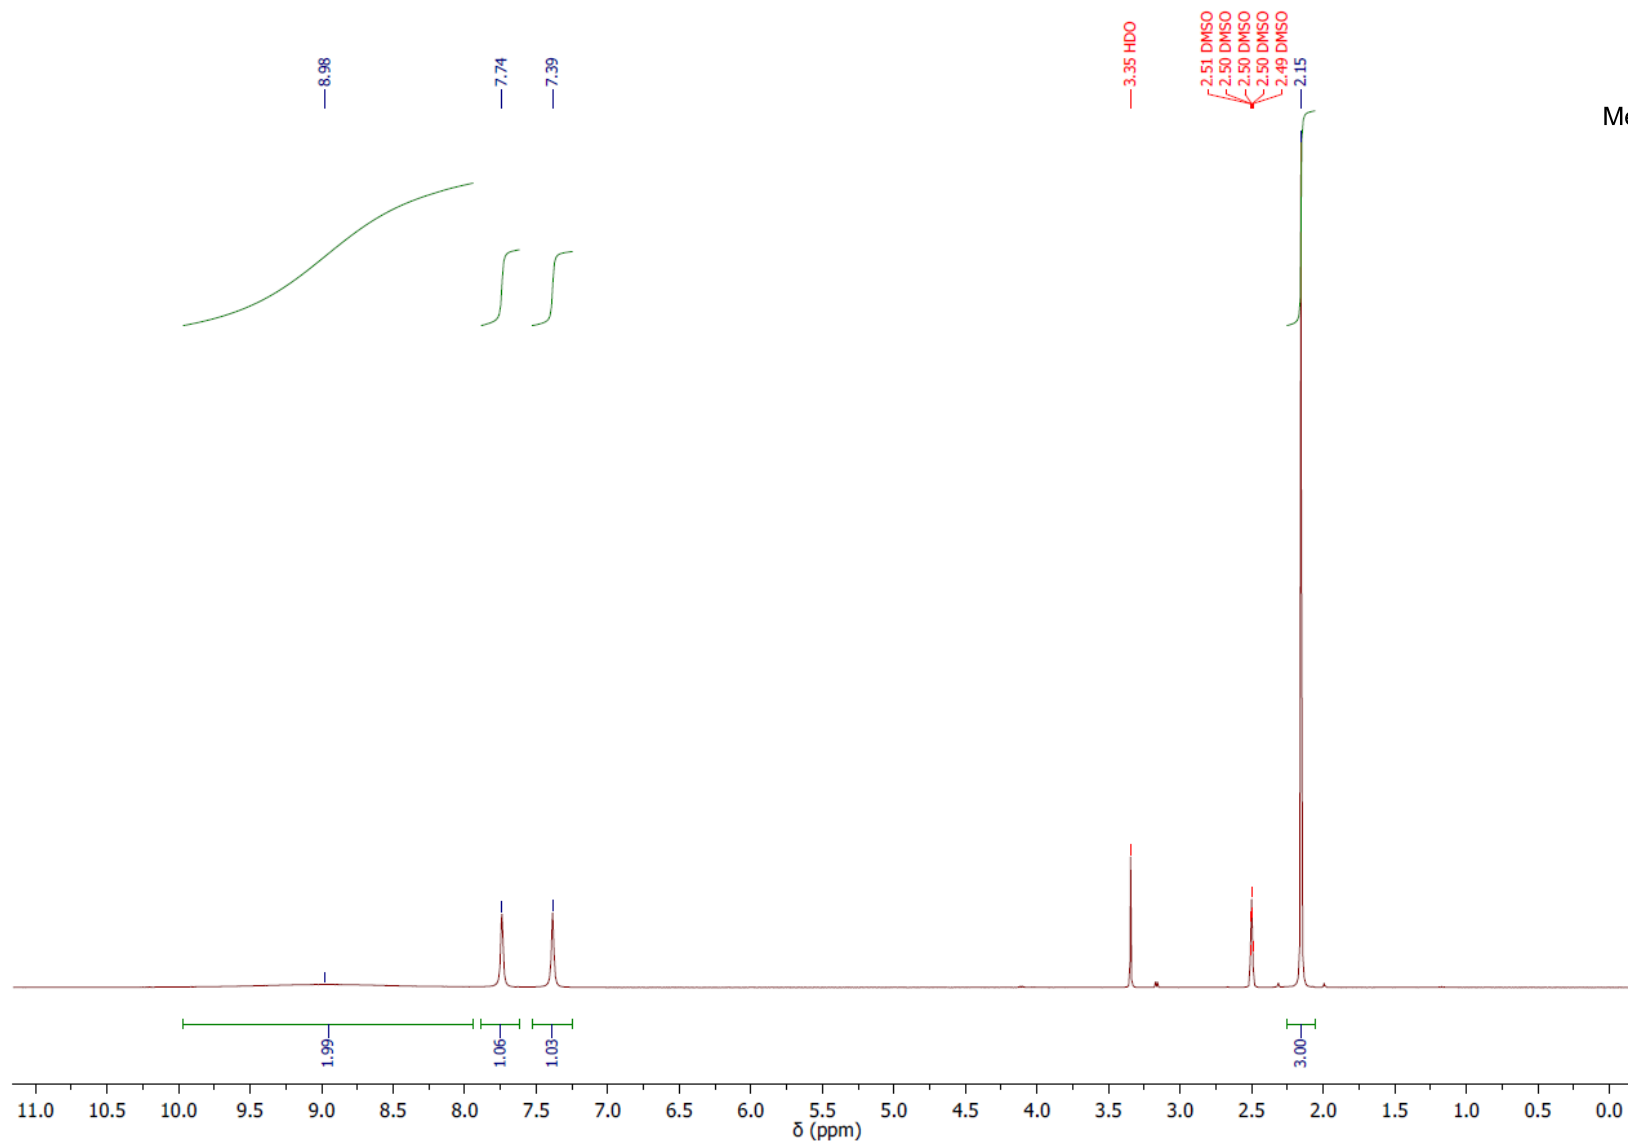

<sup>1</sup>H NMR spectrum (DMSO-d<sub>6</sub>) of (Z)-2-acetyl-3-amino-4,4,4-trifluorobut-2-enamide (9)

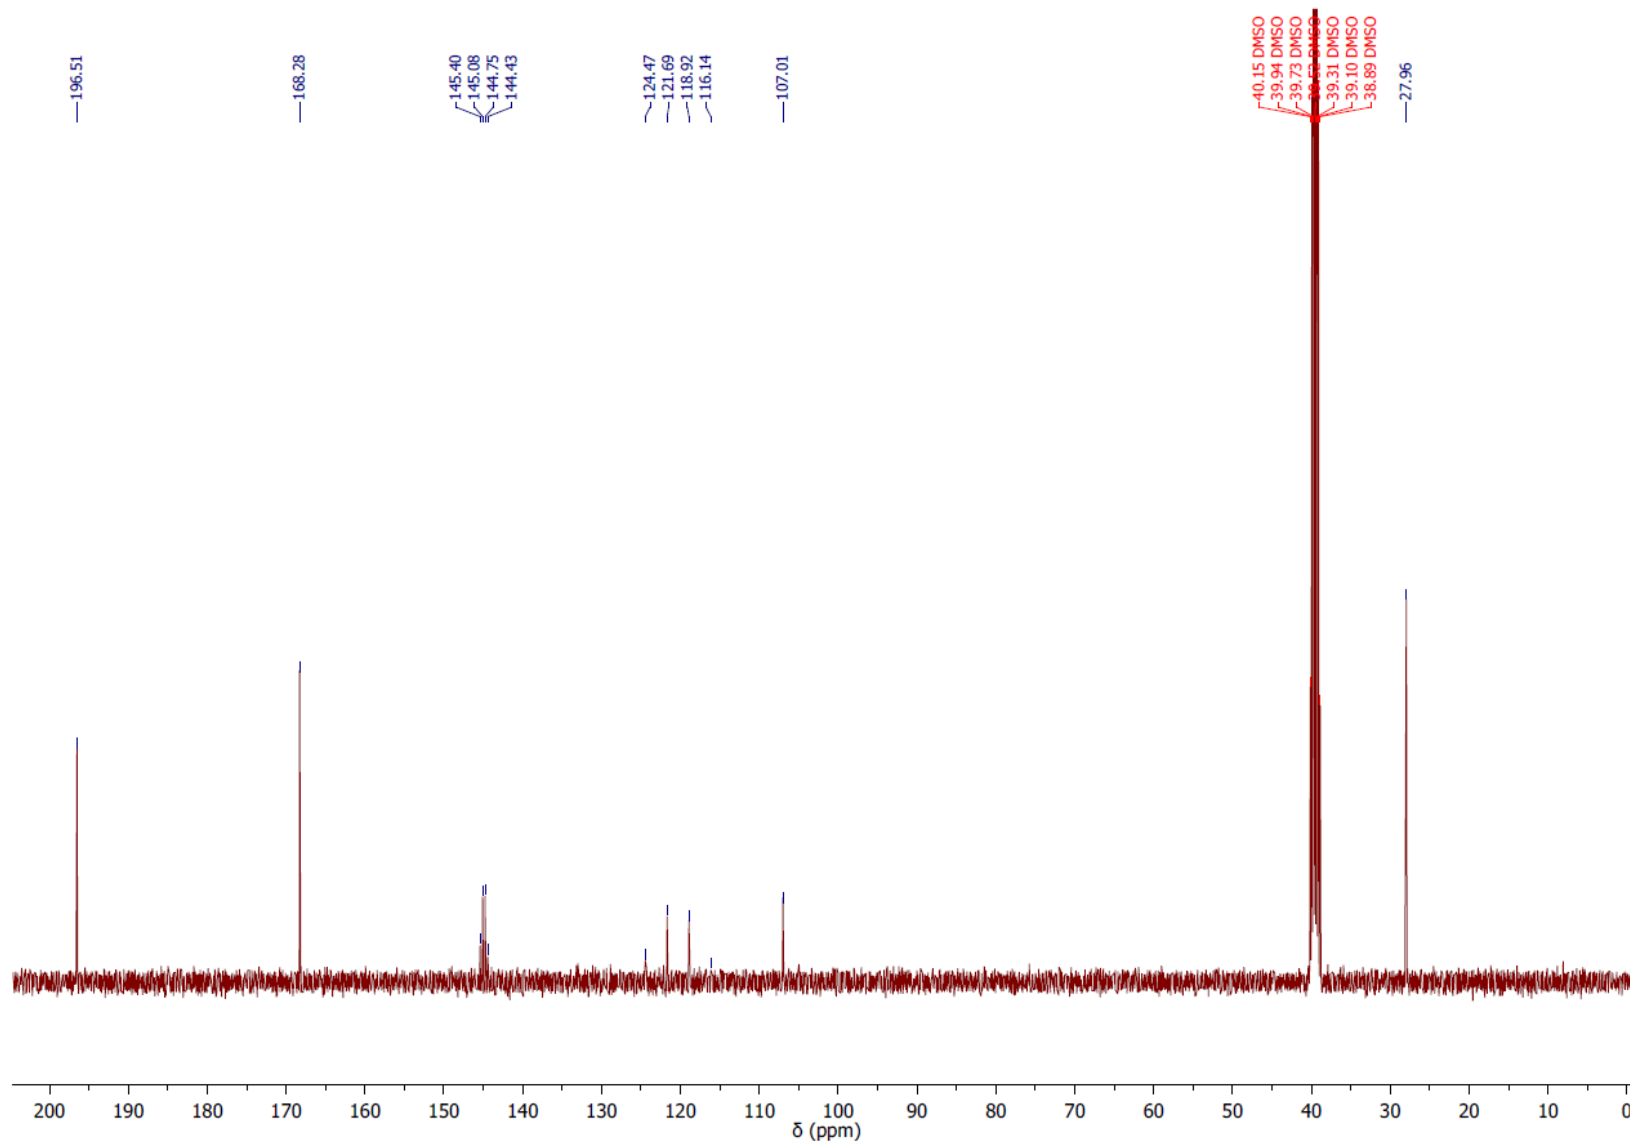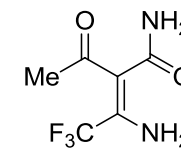

$^{13}\text{C}$  NMR spectrum (DMSO- $\text{d}_6$ ) of (Z)-2-acetyl-3-amino-4,4,4-trifluorobut-2-enamide (**9**)



|                        |                                                                   |                        |
|------------------------|-------------------------------------------------------------------|------------------------|
| Acquisition Time (sec) | 5.3084                                                            |                        |
| Comment                | 5 mm PABBO BB-1H/D Z-GRD Z828401/0055                             |                        |
| D                      | 2.4                                                               | D1 2.4                 |
| DE                     | 6                                                                 | DS 2                   |
| Date                   | 06 Nov 2017 10:36:44                                              |                        |
| Date Stamp             | 06 Nov 2017 10:36:44                                              |                        |
| File Name              | \\nask.man.ac.uk\home\l\Desktop\lqg537 freeze stab\10\PDATA\1\1tr |                        |
| Frequency (MHz)        | 300.1300                                                          | GB 0                   |
| INSTRUM                | <spect>                                                           | LB 0.3                 |
| NS                     | 16                                                                | Nucleus 1H             |
| Number of Transients   | 16                                                                | Origin spect           |
| Original Points Count  | 32768                                                             | Owner nmr              |
| PC                     | 1                                                                 |                        |
| PROBHD                 | <5 mm PABBO BB-1H/D Z-GRD Z828401/0055 >                          |                        |
| PULPROG                | <zq30>                                                            | Points Count 32768     |
| Pulse Sequence         | zq30                                                              | Receiver Gain 1024.00  |
| SF                     | 300.13                                                            | SFO1 300.131407219883  |
| SI                     | 32768                                                             | SSB 0                  |
| SW(cyclical) (Hz)      | 6172.84                                                           | SWH 6172.83950617284   |
| Solvent                | CHLOROFORM-d                                                      |                        |
| Spectrum Offset (Hz)   | 1404.3987                                                         | Spectrum Type standard |
| Sweep Width (Hz)       | 6172.65                                                           | TD 65536               |
| TD0                    | 1                                                                 | TE 295.56              |
| Temperature (degree C) | 22.560                                                            | UNC1 <1H>              |
| WDW                    | 1                                                                 |                        |

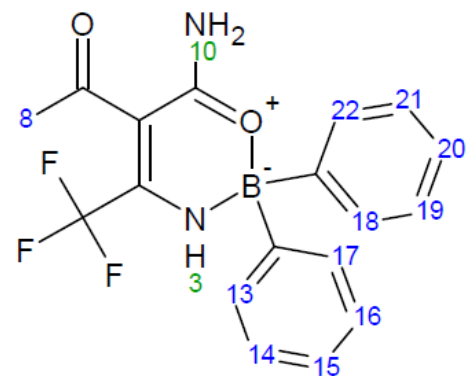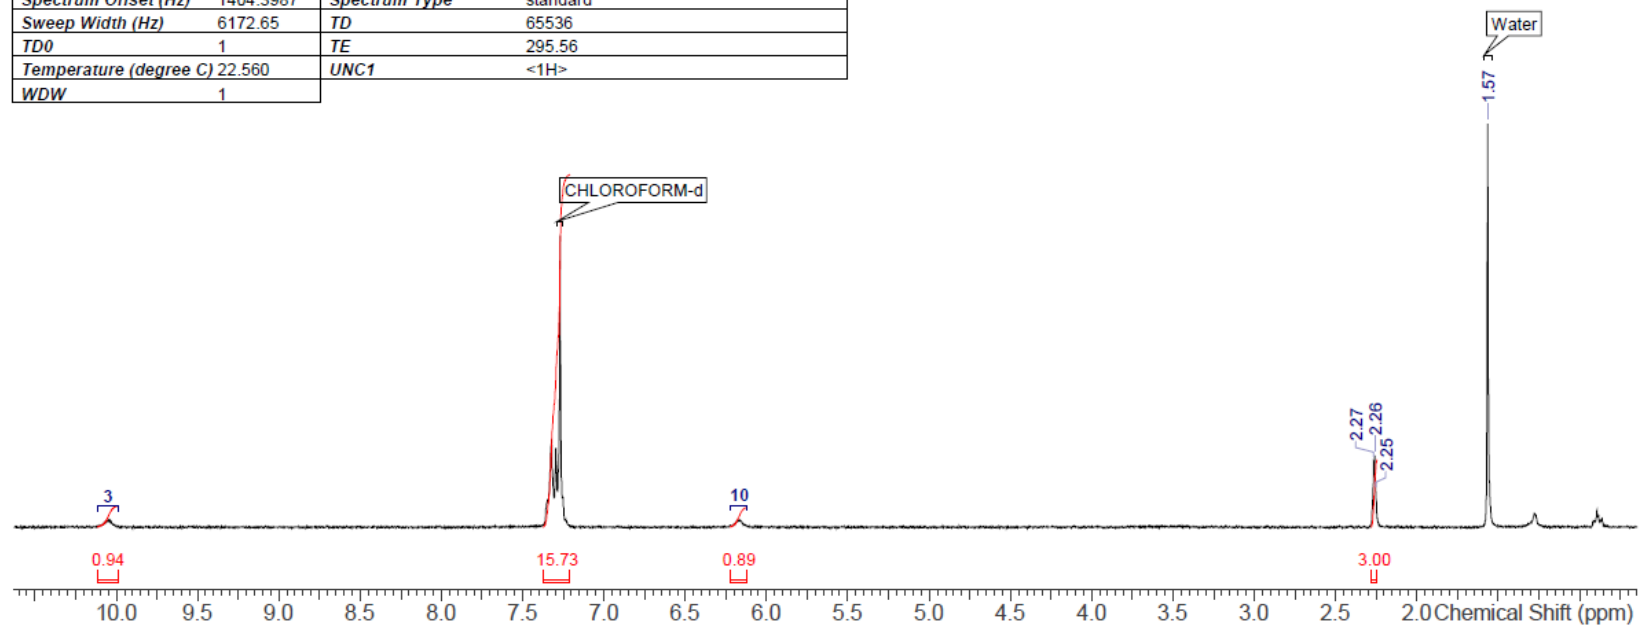

$^1\text{H}$  NMR spectrum ( $\text{CDCl}_3$ ) of 5-acetyl-6-amino-2,2-diphenyl-4-(trifluoromethyl)-2,3-dihydro-1,3,2-oxazaborinin-1-ium-2-uide (NBC42)

|                        |                                              |               |                  |
|------------------------|----------------------------------------------|---------------|------------------|
| Acquisition Time (sec) | 1.8219                                       | Comment       | James-537        |
| D                      | 0.00345                                      | D1            | 2                |
| DE                     | 6.5                                          | DS            | 4                |
| Date                   | 08 Nov 2017 04:50:01                         |               |                  |
| Date Stamp             | 08 Nov 2017 04:50:01                         |               |                  |
| File Name              | \nask.man.ac.uk\home\$\Desktop\40\PDATA\1\1r |               |                  |
| Frequency (MHz)        | 75.4678                                      | GB            | 0                |
| INSTRUM                | <spect>                                      | LB            | 1                |
| NS                     | 10240                                        | Nucleus       | 13C              |
| Number of Transients   | 10240                                        | Origin        | spect            |
| Original Points Count  | 32768                                        | Owner         | nmr              |
| PC                     | 1.4                                          |               |                  |
| PROBHD                 | <5 mm PABBO BB-1H/D Z-GRD Z828401/0055 >     |               |                  |
| PULPROG                | <zgpg30>                                     | Points Count  | 32768            |
| Pulse Sequence         | zgpg30                                       | Receiver Gain | 32768.00         |
| SF                     | 75.467749                                    | SFO1          | 75.4752953008526 |
| SI                     | 32768                                        | SSB           | 0                |
| SW(cyclical) (Hz)      | 17985.61                                     | SWH           | 17985.6115107914 |
| Solvent                | CHLOROFORM-d                                 |               |                  |
| Spectrum Offset (Hz)   | 7545.1973                                    | Spectrum Type | standard         |
| Sweep Width (Hz)       | 17985.06                                     | TD            | 65536            |
| TD0                    | 1                                            | TE            | 296.56           |
| Temperature (degree C) | 23.560                                       | UNC1          | <13C>            |
| WDW                    | 1                                            |               |                  |

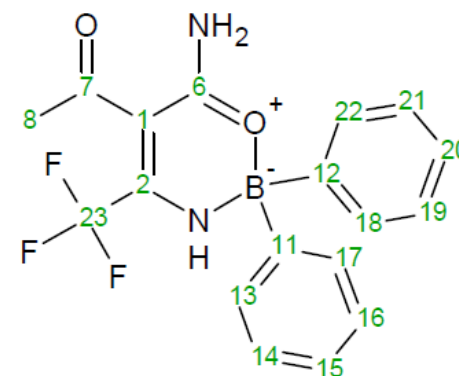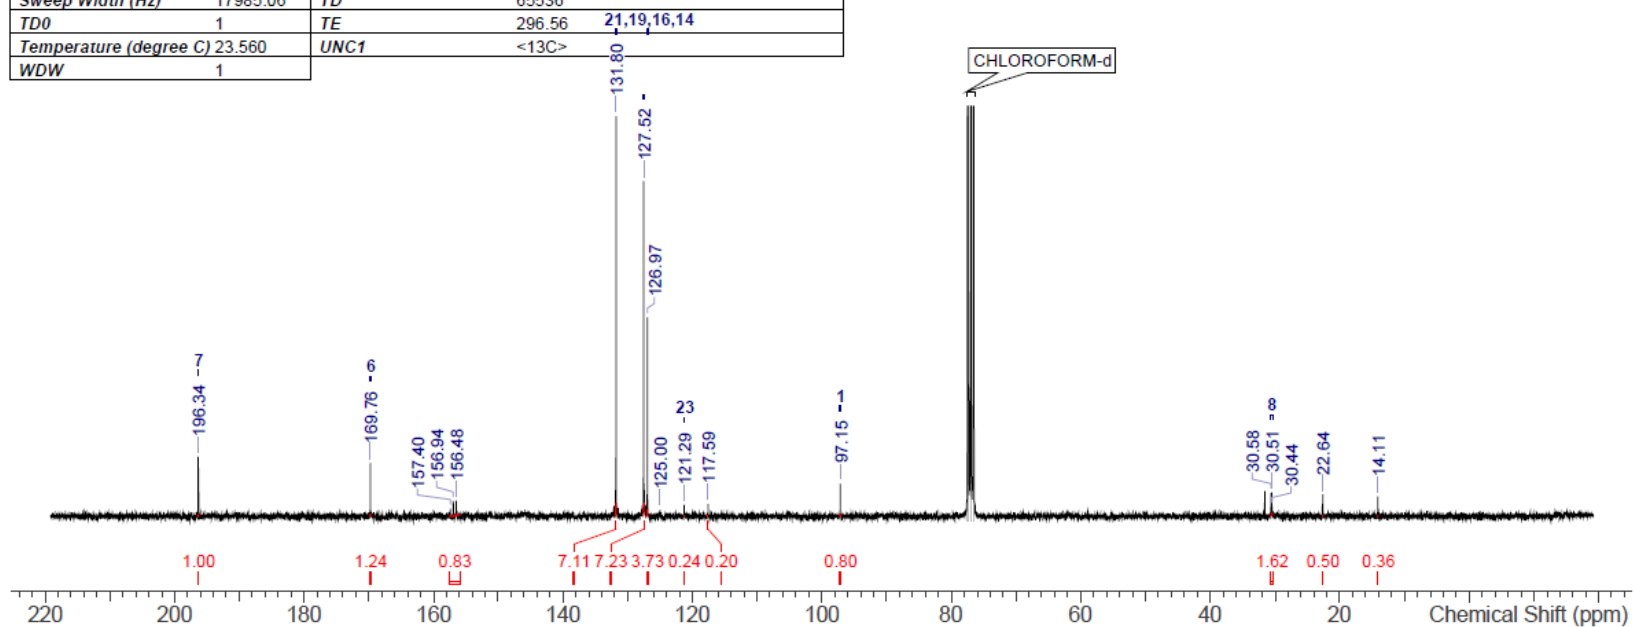

<sup>13</sup>C NMR spectrum (CDCl<sub>3</sub>) of 5-acetyl-6-amino-2,2-diphenyl-4-(trifluoromethyl)-2,3-dihydro-1,3,2-oxazaborinin-1-ium-2-uide (NBC42)
